# Supplementary material for: Chemical profiling analysis of Maca using UHPLC-ESI-Orbitrap MS coupled with UHPLC-ESI-QqQ MS and the neuroprotective study on its active ingredients
Source: PubMed Central journal article supplement (PMC5356334; doi:10.1038/srep44660), 2017-03-17
Supplement: srep44660-s1.pdf [file srep44660-s1.pdf]

# Chemical profiling analysis of Maca using UHPLC-ESI-Orbitrap MS coupled with UHPLC-ESI-QqQ MS and the neuroprotective study on its active ingredients

Yanyan Zhou<sup>1#</sup> Peng Li<sup>2#</sup> Adelheid Brantner<sup>3</sup> Hongjie Wang<sup>1</sup> Xinbin Shu<sup>4</sup> Jian Yang<sup>1</sup> Nan Si<sup>1</sup> Lingyu Han<sup>1</sup> Haiyu Zhao<sup>1\*</sup> & Baolin Bian<sup>1\*</sup>

<sup>1</sup>Institute of Chinese Materia Medica, China Academy of Chinese Medical Sciences, Beijing, China

<sup>2</sup>Institute of Chinese Medical Sciences, University of Macau, Macau, China

<sup>3</sup>Institute of Pharmaceutical Sciences Pharmacognosy, University of Graz, Graz, Austria

<sup>4</sup>Shandong Rosemed Biopharm LTC, Yanzhou, Shandong province, China

#: These two authors contributed equally to the paper

\*Correspondence author at: Institute of Chinese Materia Medica, China Academy of Chinese Medical Sciences

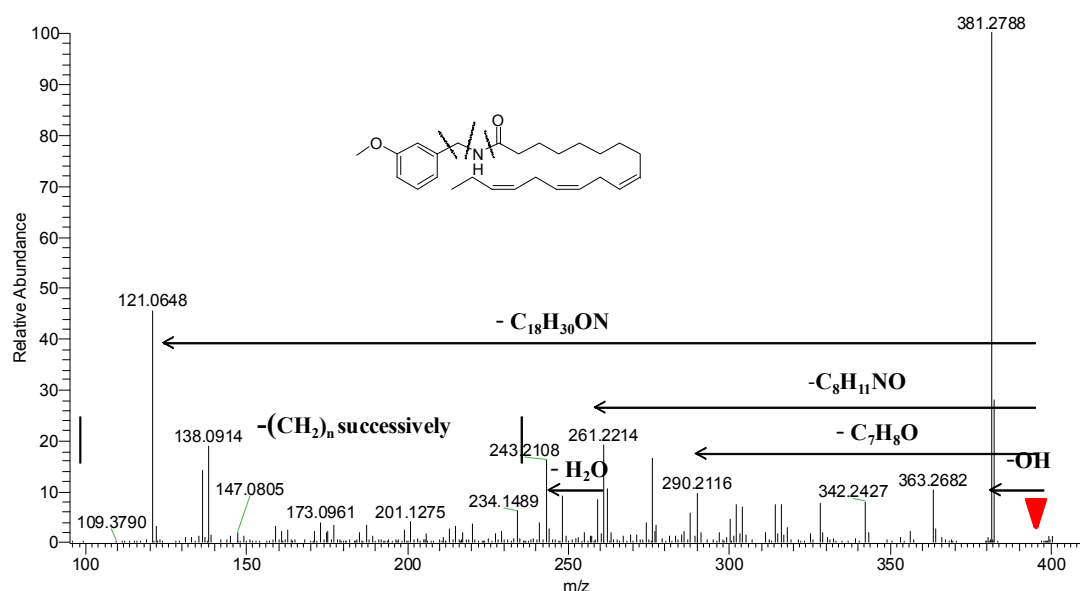

Figure S1 The MS/MS spectrum of N-(3-methoxybenzyl)-(9Z,12Z,15Z)-octadecatrienamide (No. A<sub>32</sub>)

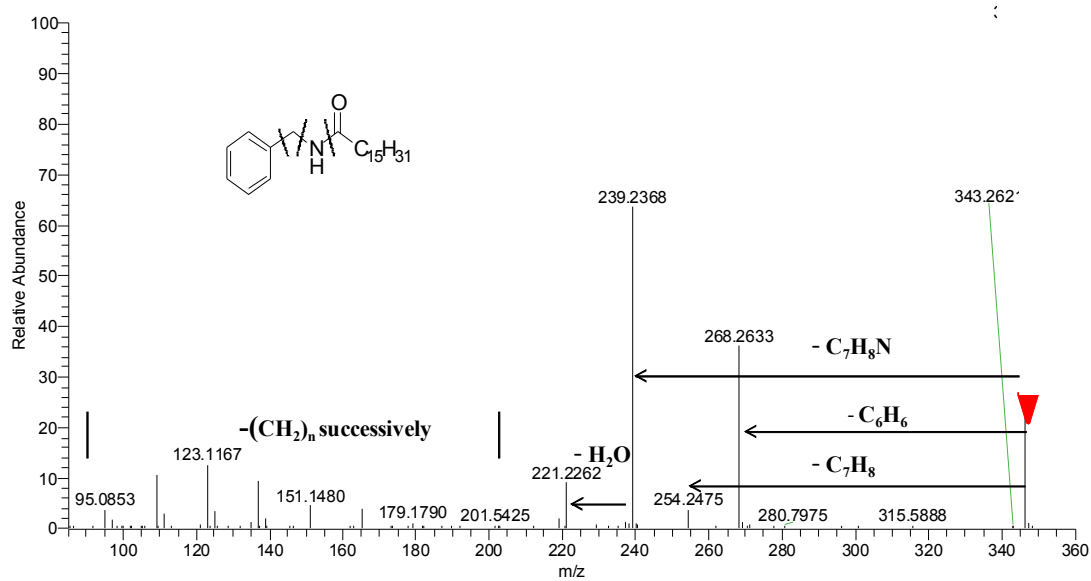

Figure S2 The MS/MS spectrum of N-benzylhexadecanamide (No. A<sub>54</sub>)

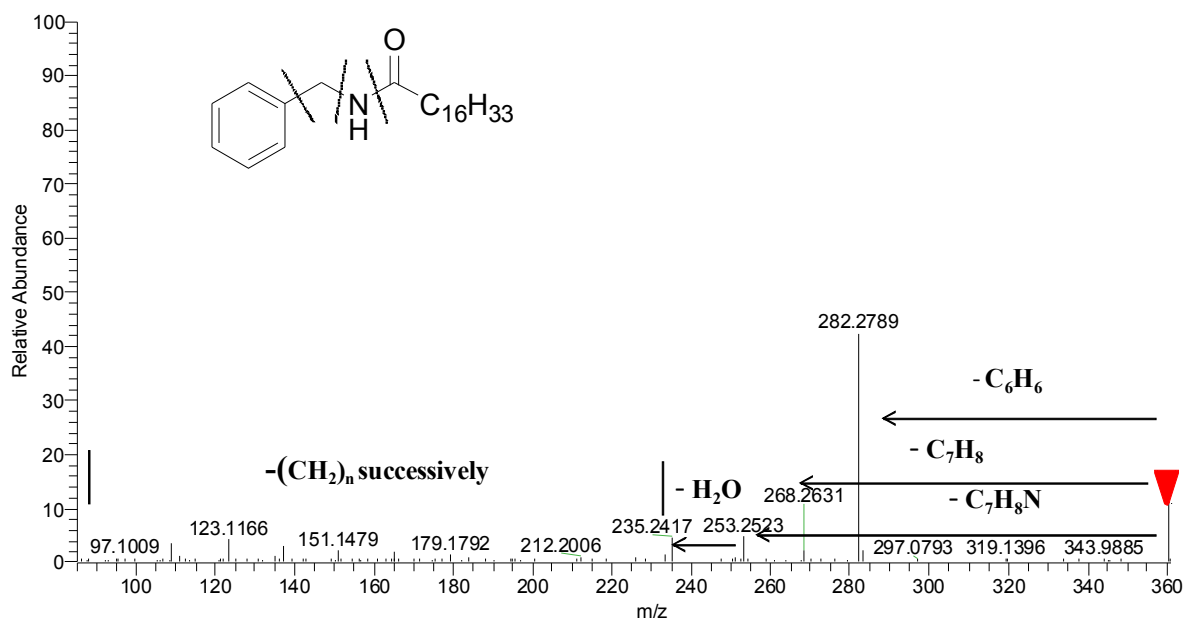

Figure S3 Proposed structures and MS/MS spectrum for N-benzylheptadecanamide (No. A<sub>58</sub>)

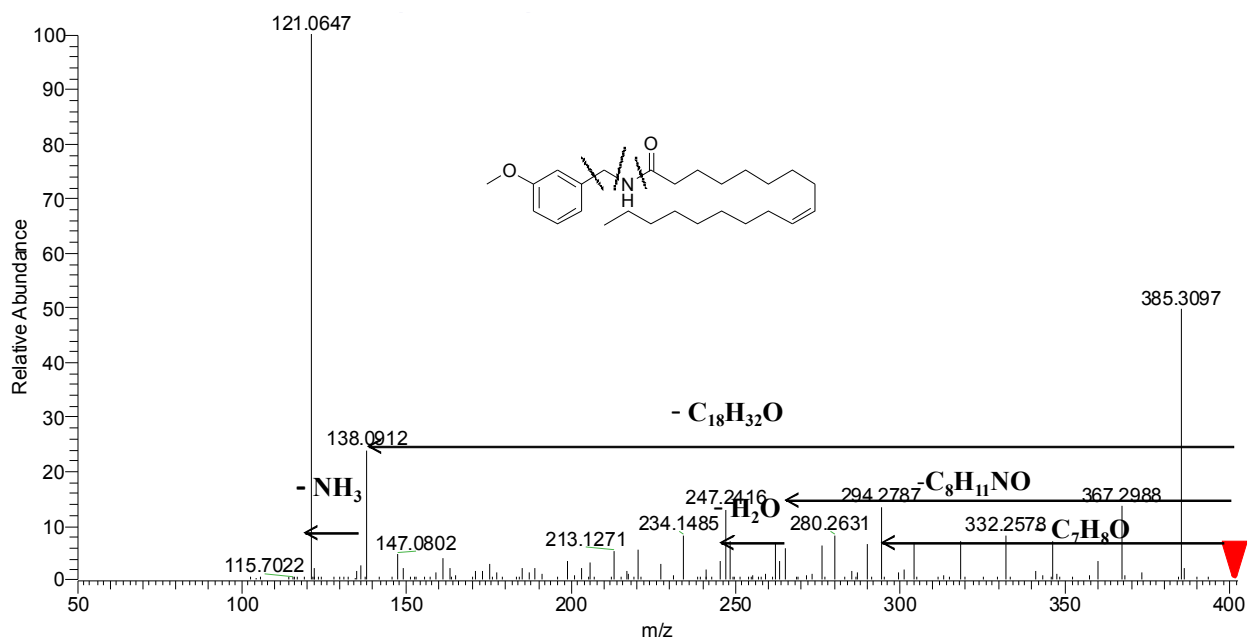

Figure S4 Proposed structures and MS/MS spectrum for N-(3-methoxybenzyl)-(9Z)-octadecenamide (No. A<sub>55</sub>)

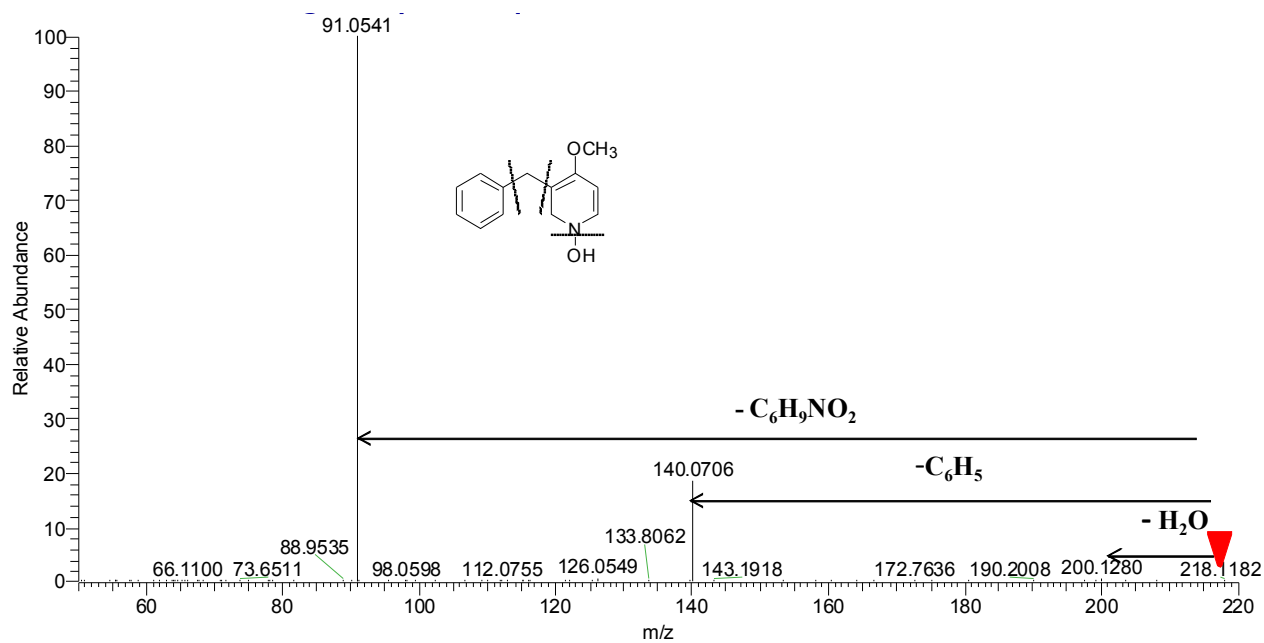

Figure S5 Proposed structures and MS/MS spectrum for 3-benzyl-1,2-dihydro-N-hydroxypyridine-4-methoxy (No. A<sub>65</sub>)

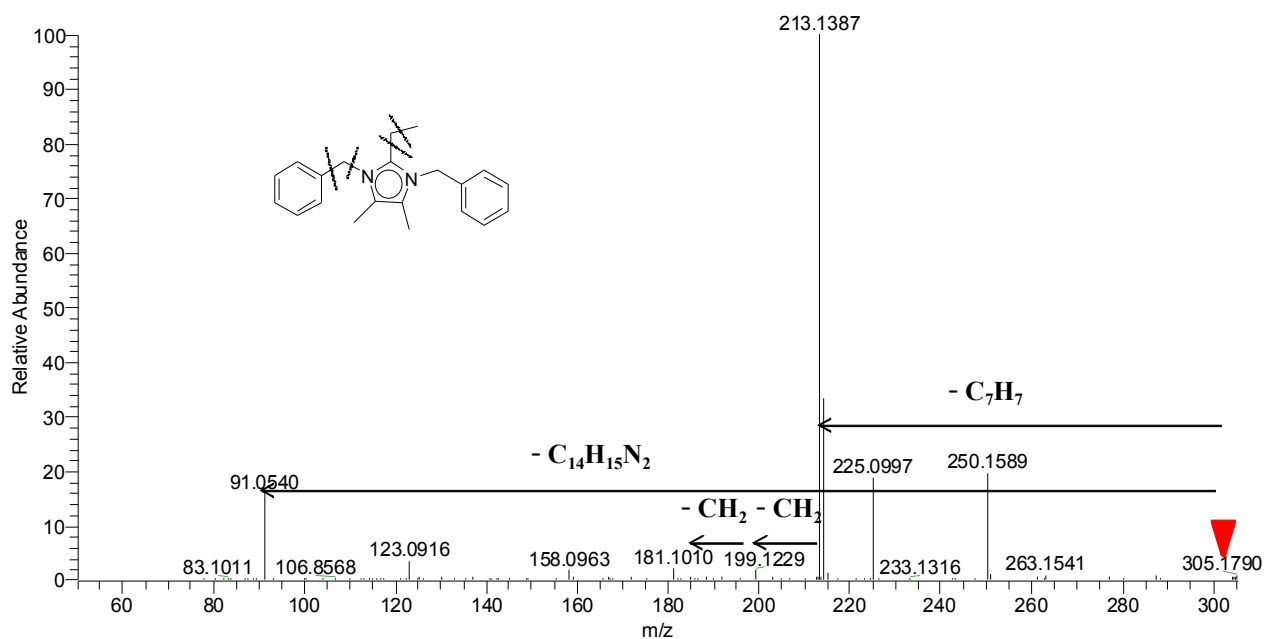

Figure S6 Proposed structures and MS/MS spectrum for 1,3-dibenzyl-2(R)-ethyl-4,5-dimethylimidazolium

(No. A<sub>84</sub>)

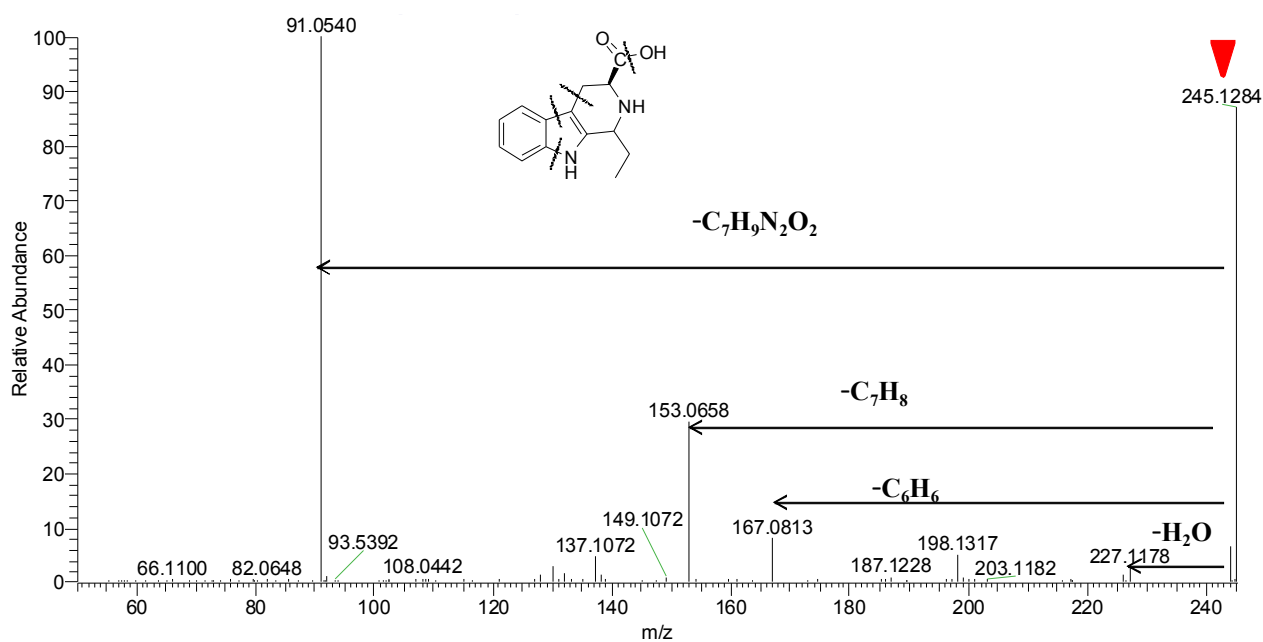

Figure S7 Proposed structures and MS/MS spectrum for (1R,3S)-1-ethyltetrahydro- $\beta$ -5,6-carboline-3-carboxylic acid (No. A<sub>111</sub>)

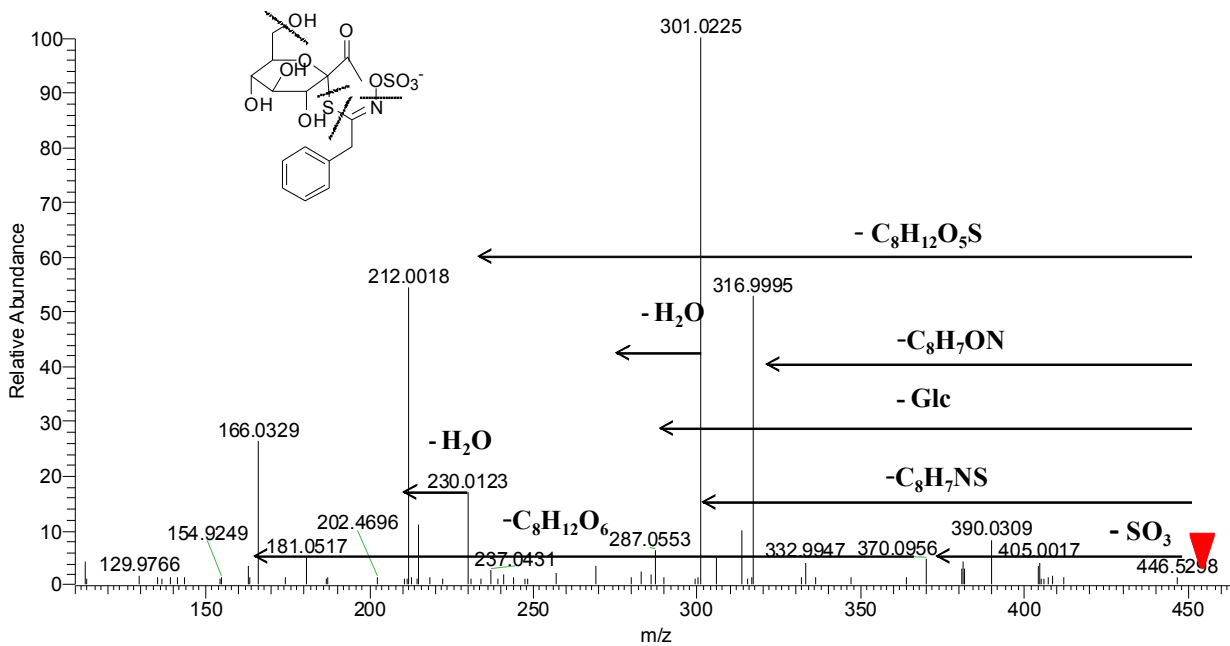

Figure S8 Proposed structures and MS/MS spectrum for acetyl-benzylglucosinolate (No. G<sub>11</sub>)

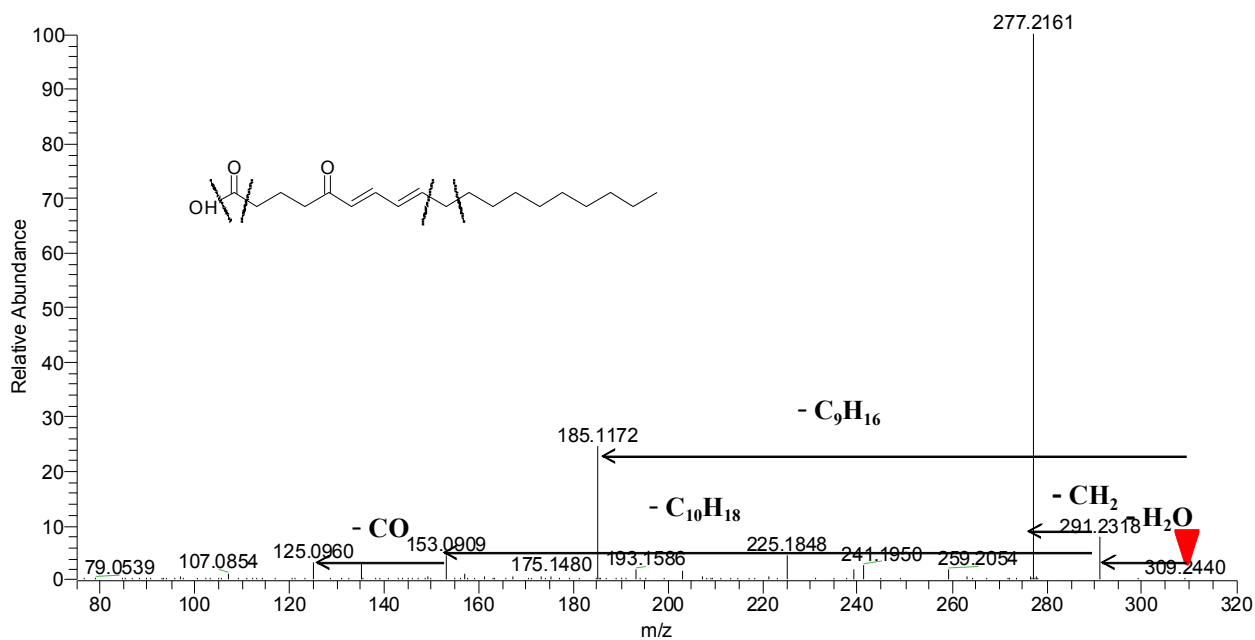

Figure S9 Proposed structures and MS/MS spectrum for 5-oxo-6E,8E-nineteencarbodienoic acid (No. M<sub>9</sub>)

RT: 0.00 - 80.00

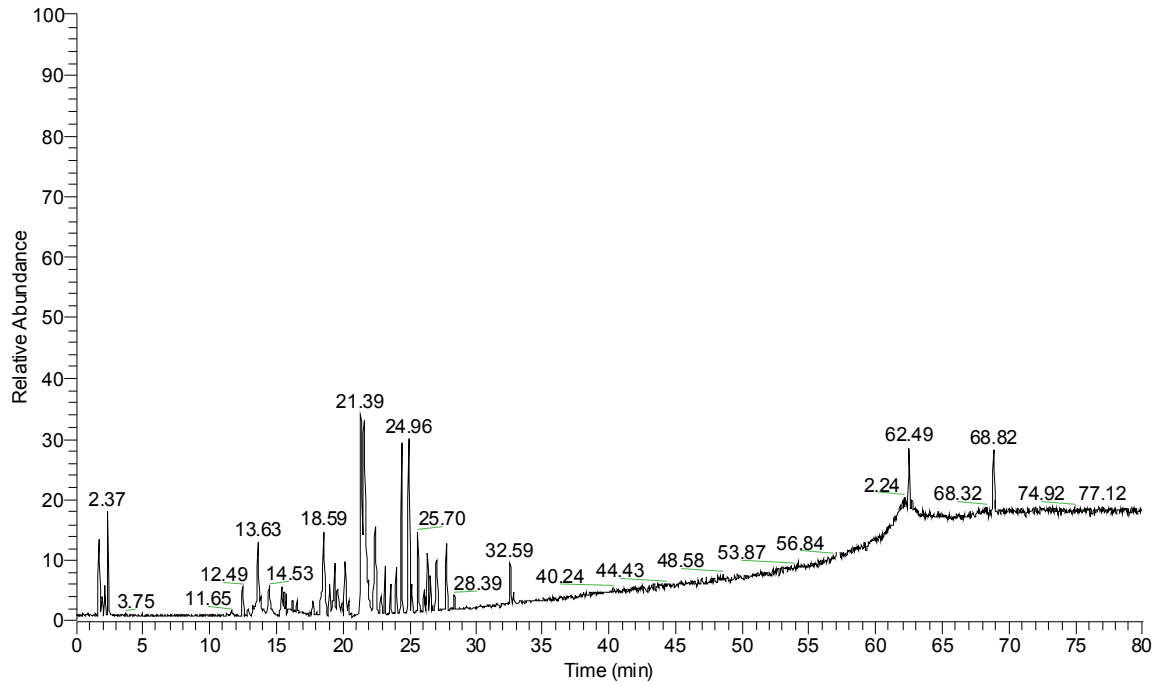

Figure S10 The LC-MS chromatogram of Fr<sub>4</sub>

RT: 0.00 - 80.01

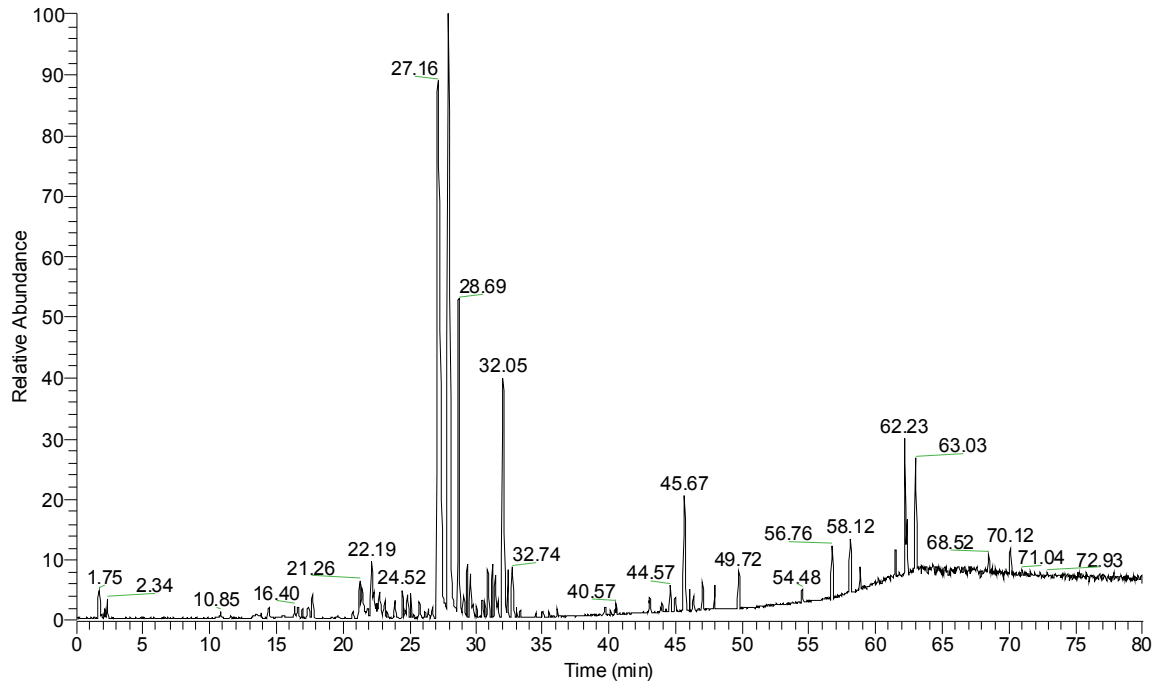

Figure S11 The LC-MS chromatogram of Fr<sub>5</sub>

RT: 0.00 - 80.01

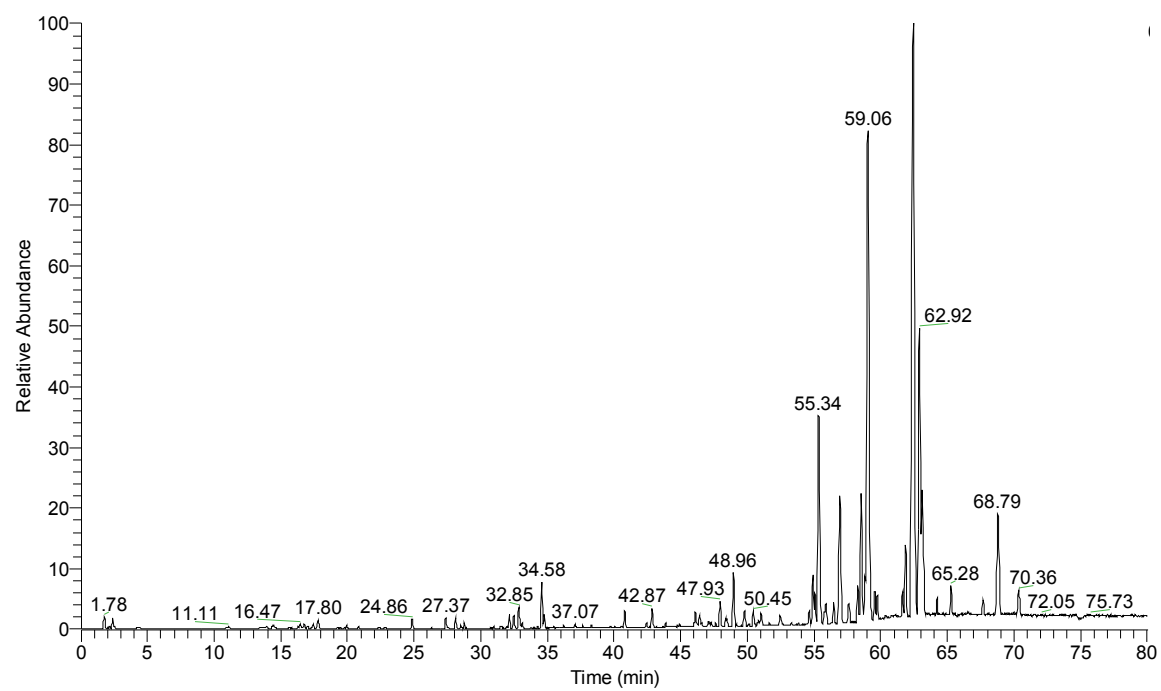

Figure S12 The LC-MS chromatogram of Fr<sub>6</sub>

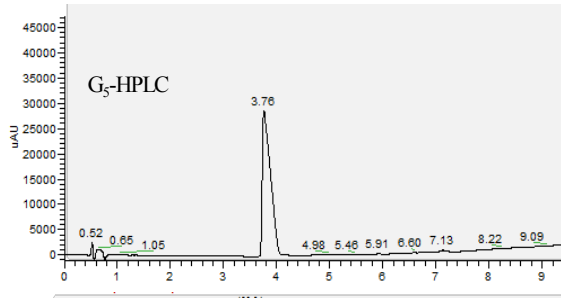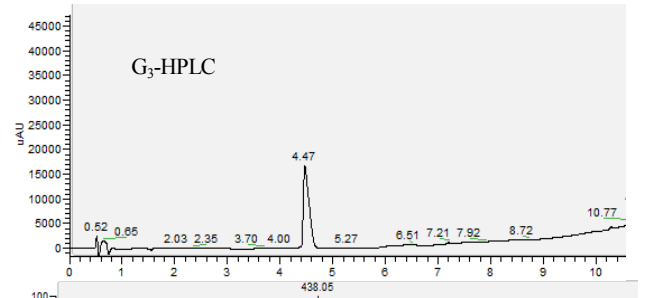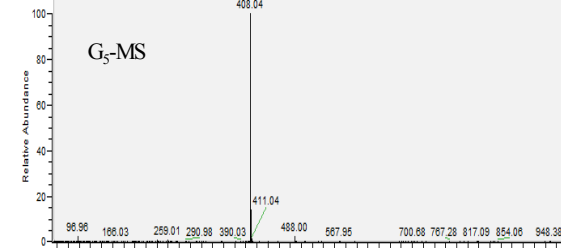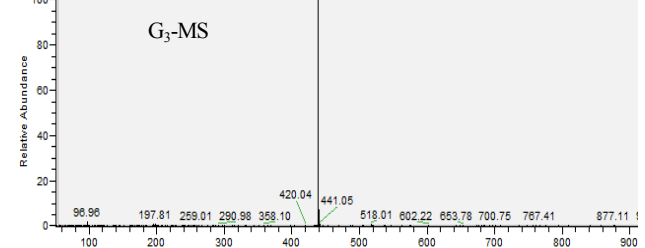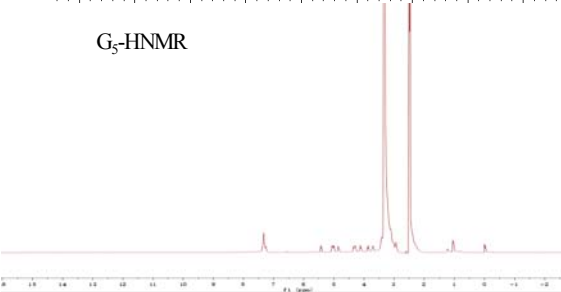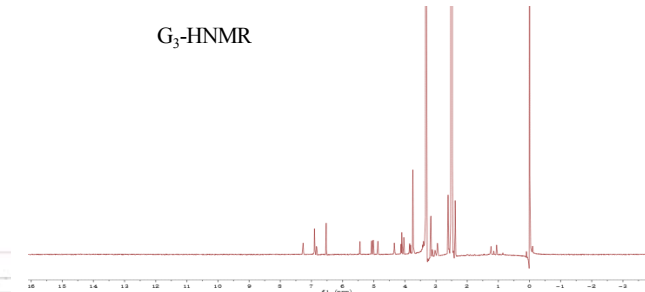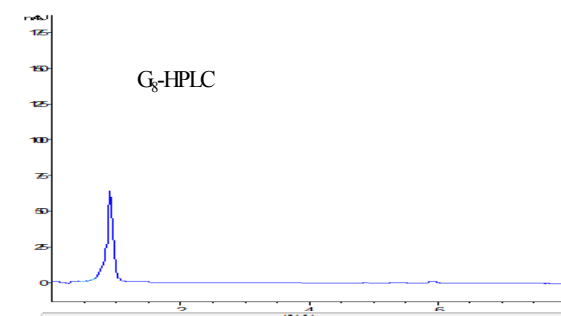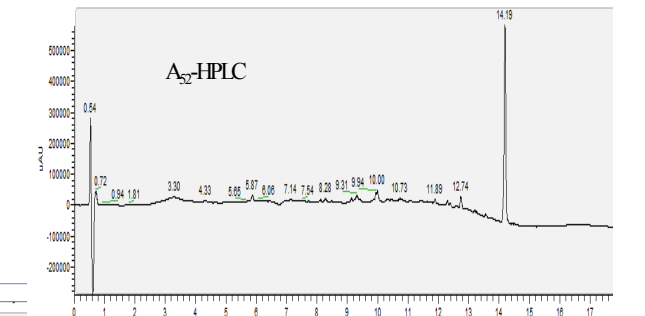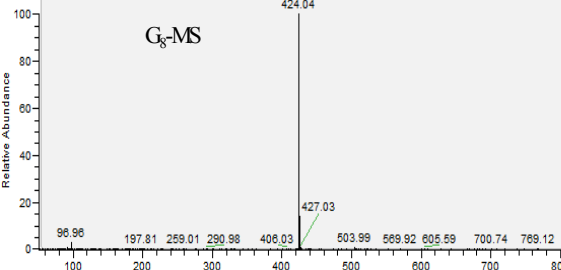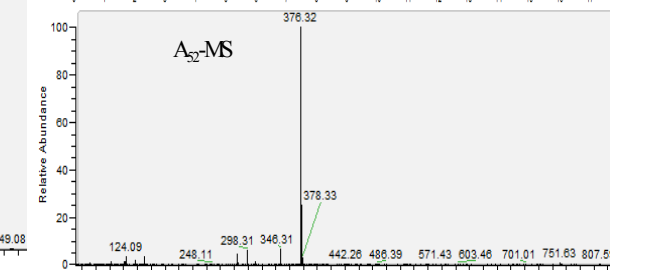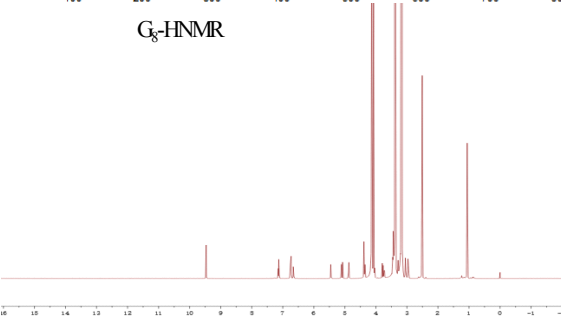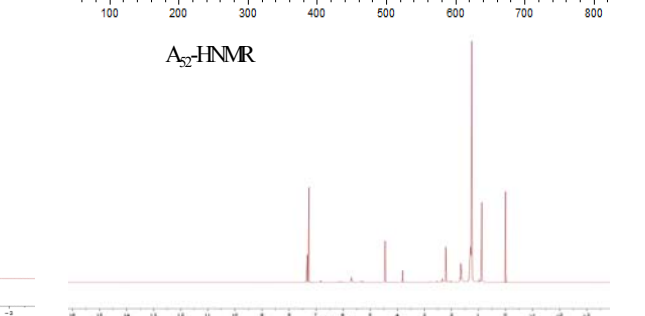



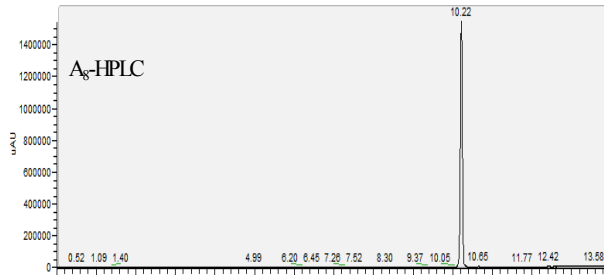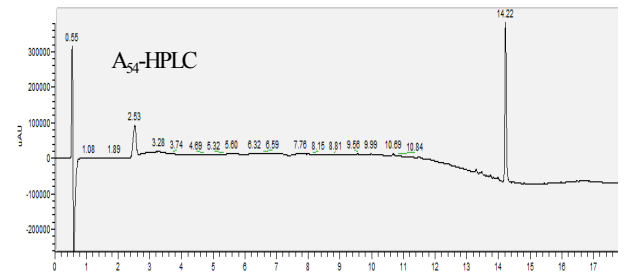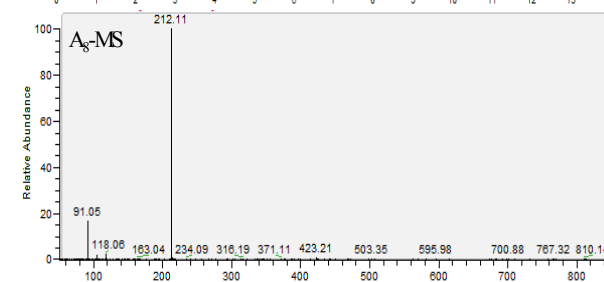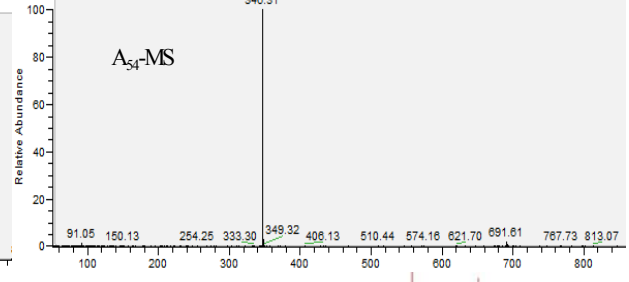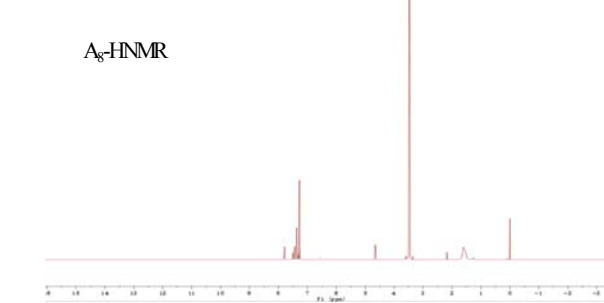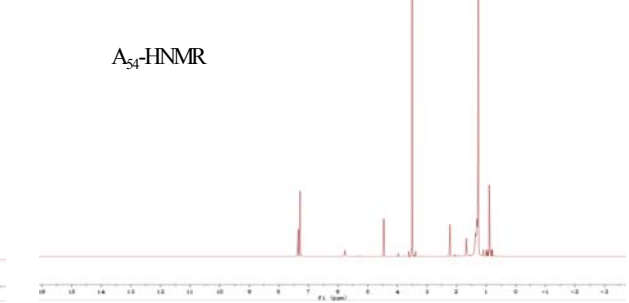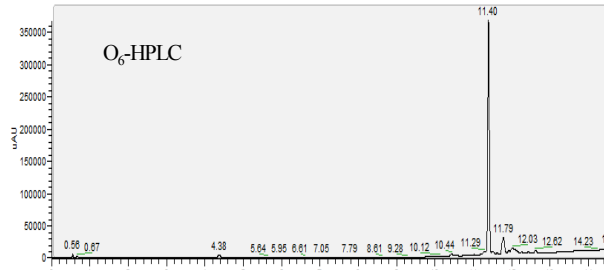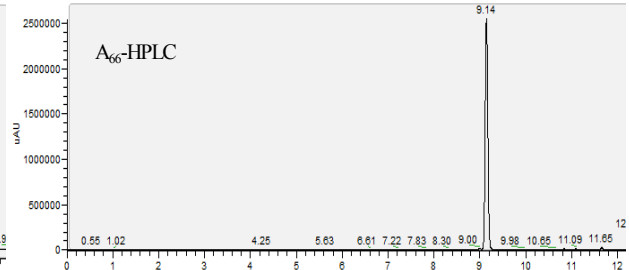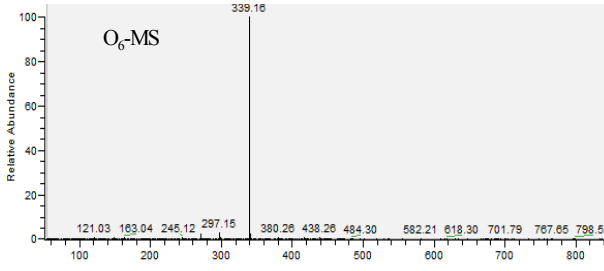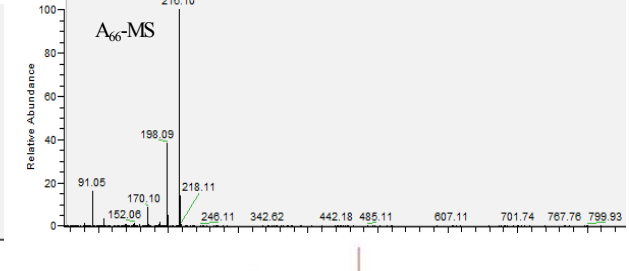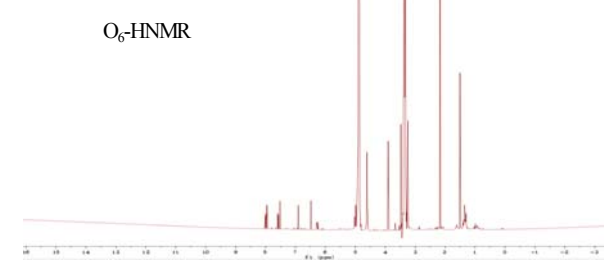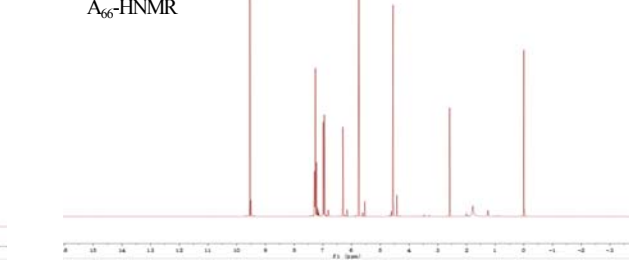

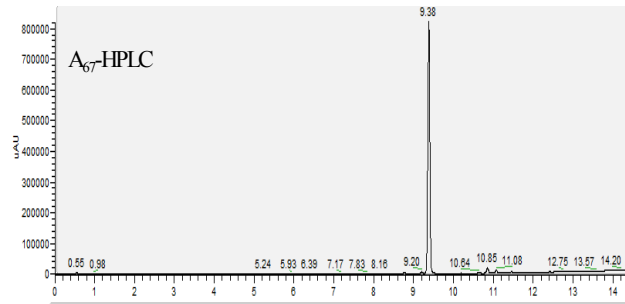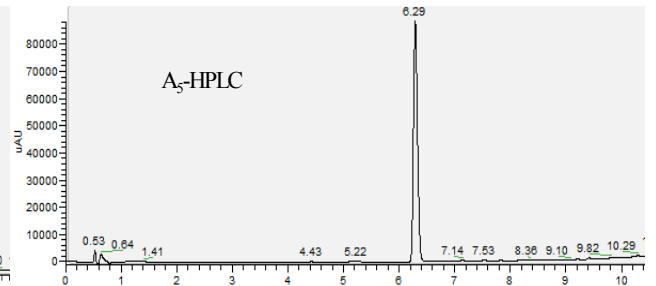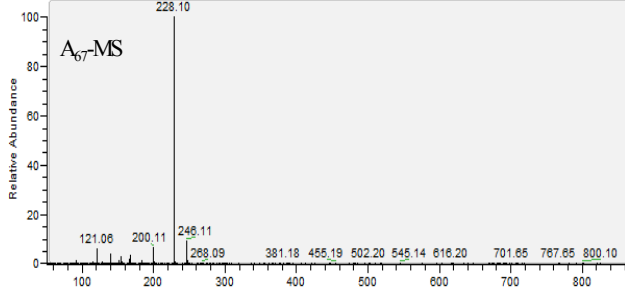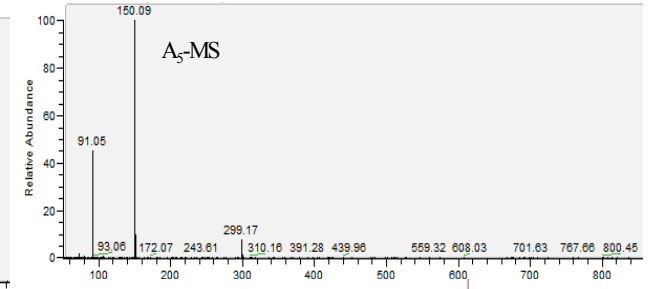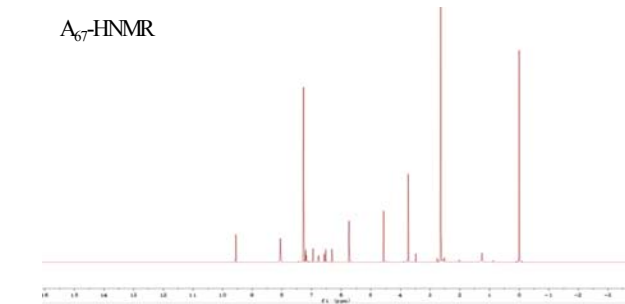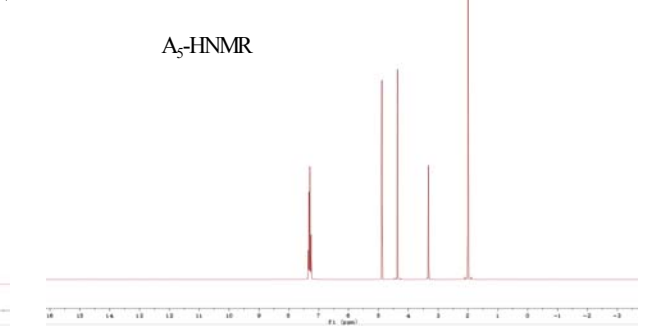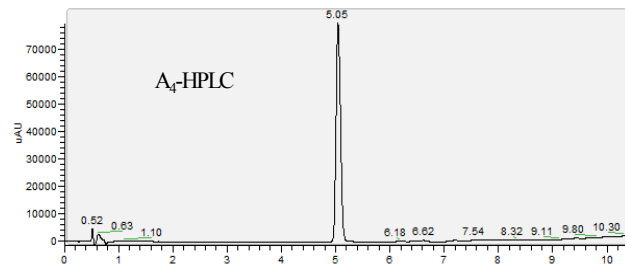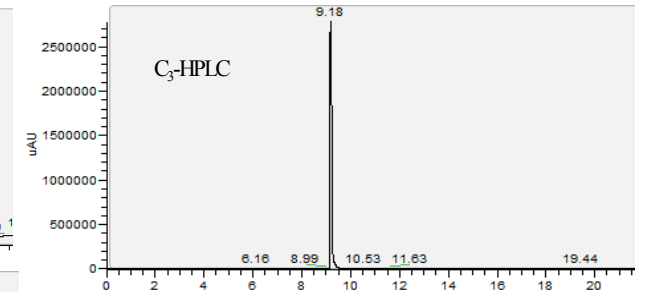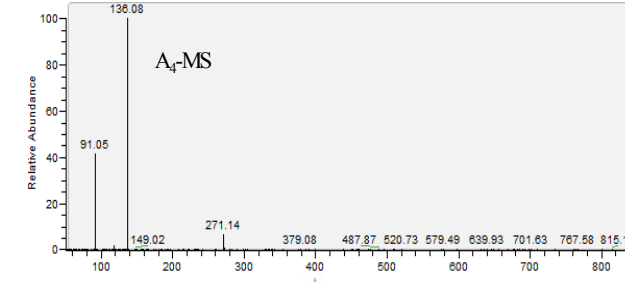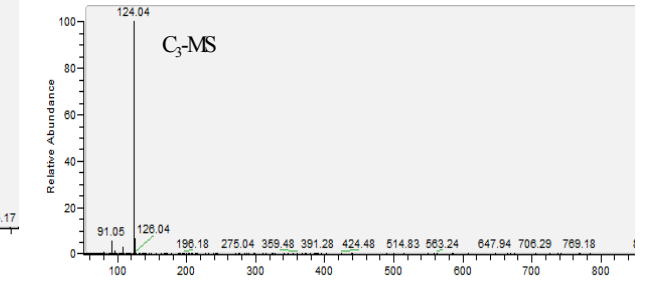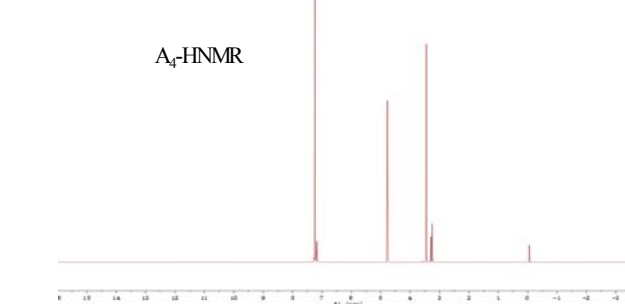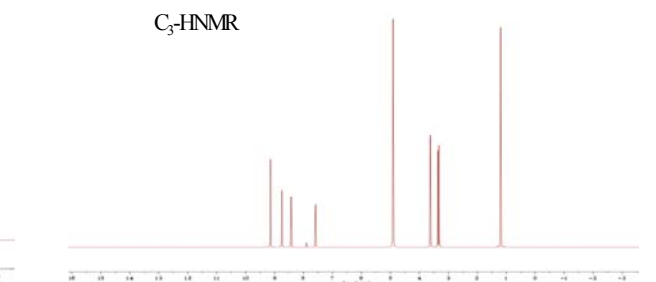

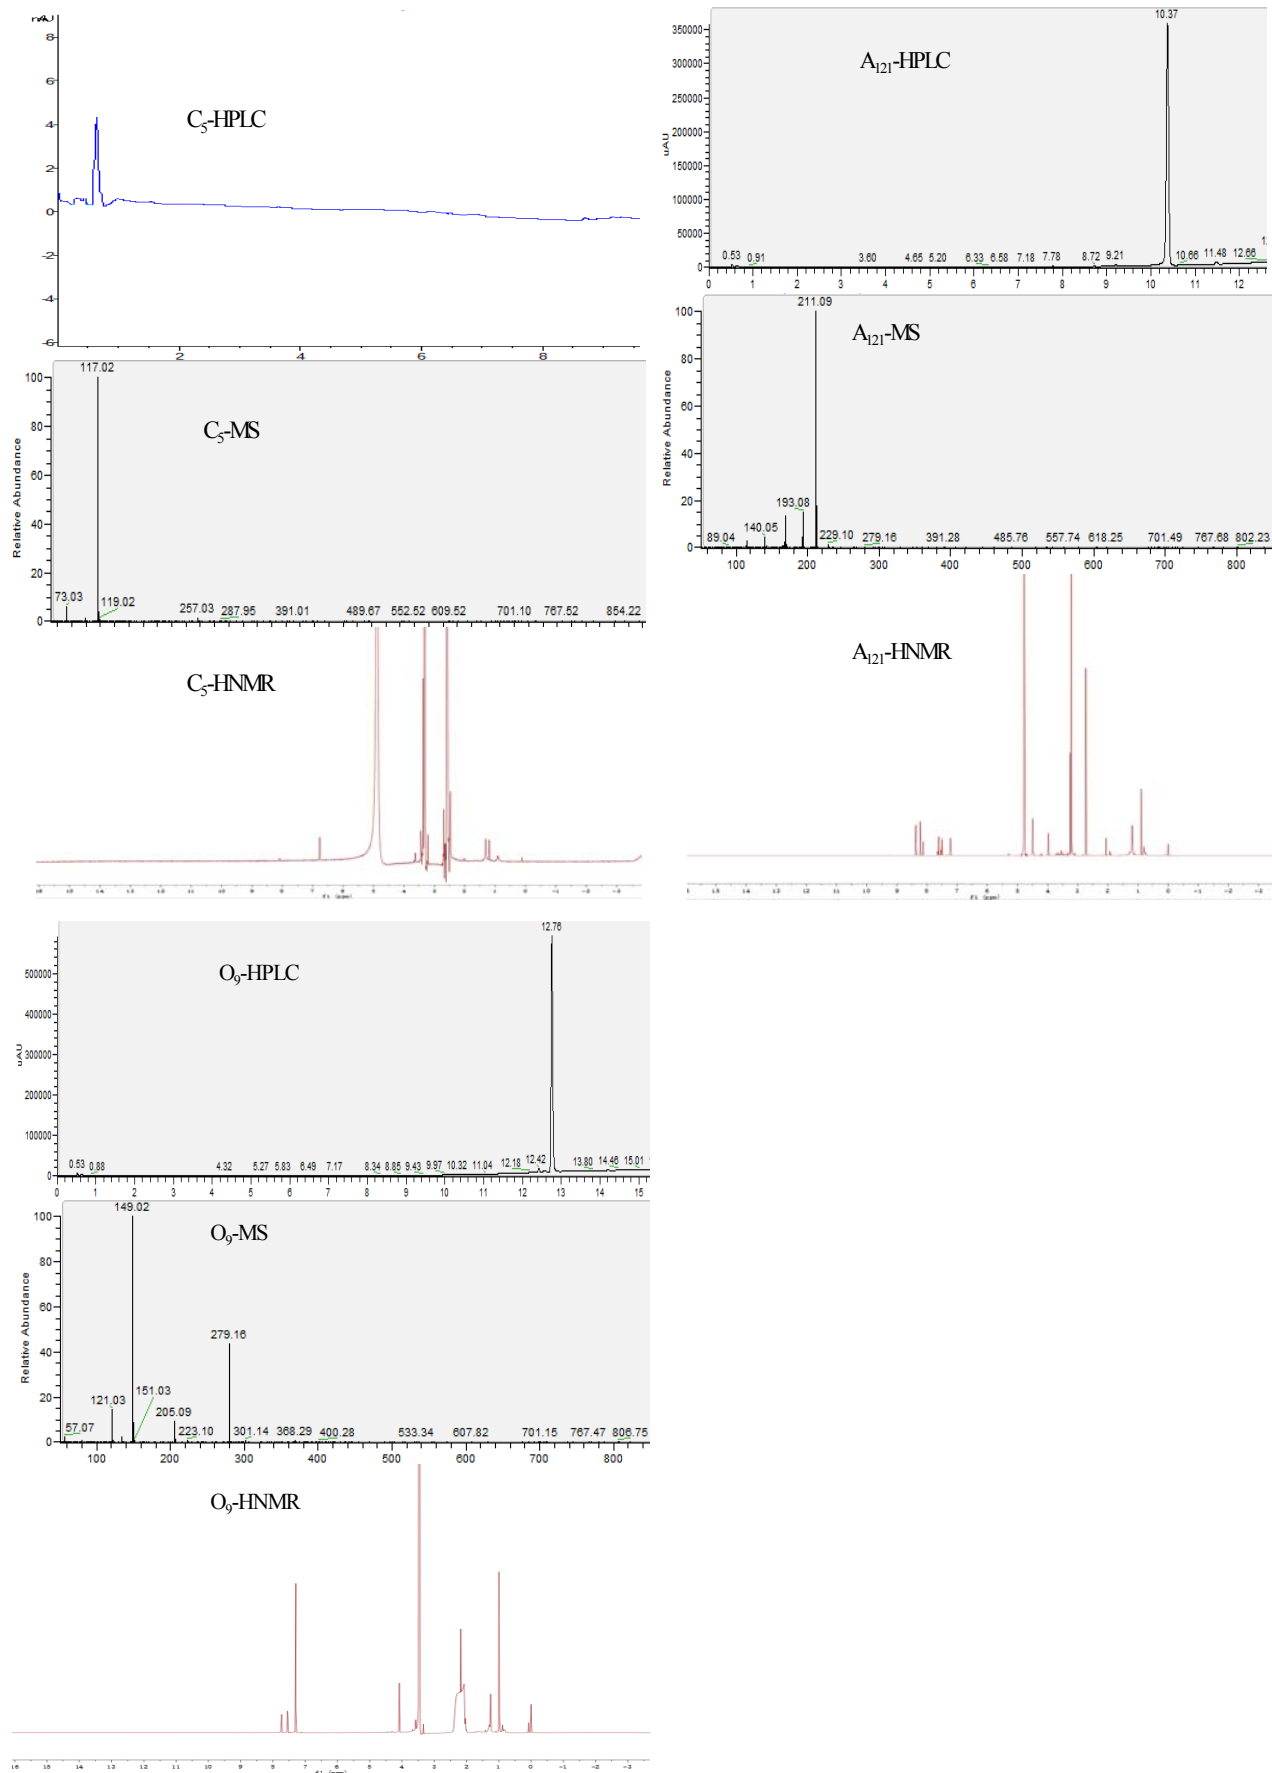

Figure S13 The HPLC, MS and HNMR spectra of 15 reference standards

Table S1 Identification of Macamides and common amide alkaloids from Maca by UHPLC-ESI-Orbitrap MS

| NO                           | name                                                         | t <sub>R</sub> (min) | Formula                                         | ESI(+)/expected<br>( <i>m/z</i> ) | ESI(+)/measured<br>( <i>m/z</i> ) | Delta<br>(ppm) | Fragamentor information                                                         |
|------------------------------|--------------------------------------------------------------|----------------------|-------------------------------------------------|-----------------------------------|-----------------------------------|----------------|---------------------------------------------------------------------------------|
| A <sub>1</sub> <sup>*</sup>  | benzylamine                                                  | 10.03                | C <sub>7</sub> H <sub>9</sub> N                 | 108.0807                          | 108.0805                          | -2.368         | <b>91.05405</b>                                                                 |
| A <sub>2</sub> <sup>*</sup>  | N-methyl-3-hydroxy-Benzeneacetamide                          | 12.29                | C <sub>9</sub> H <sub>11</sub> NO <sub>2</sub>  | 166.0862                          | 166.0859                          | -1.657         | 149.0597, 131.0491, <b>120.0808</b> , 91.0540                                   |
| A <sub>3</sub>               | N-benzyl-2E,4E-fivecarbondienamide                           | 16.35                | C <sub>12</sub> H <sub>11</sub> NO              | 186.0913                          | 186.0912                          | -0.487         | 168.1016, 158.0725, <b>126.05479</b> , 104.0544                                 |
| A <sub>4</sub> <sup>*</sup>  | 2-phenylacetamide                                            | 17.89                | C <sub>8</sub> H <sub>9</sub> NO                | 136.0756                          | 136.0757                          | 0.070          | <b>119.0489</b> , 91.0037                                                       |
| A <sub>5</sub> <sup>*</sup>  | N-acetylbenzylamine                                          | 20.04                | C <sub>9</sub> H <sub>11</sub> NO               | 150.0913                          | 150.0911                          | -0.151         | <b>130.4232</b> , 116.0710, 91.0540                                             |
| A <sub>6</sub>               | N-(3-hydroxy-benzyl)-2Z-fivecarbon acrylamide                | 20.08                | C <sub>10</sub> H <sub>13</sub> NO <sub>2</sub> | 180.1019                          | 180.1019                          | 0.027          | <b>162.0914</b> , 152.1071, 138.0915, 112.0757, 95.0490                         |
| A <sub>7</sub>               | N-(3-hydroxy-benzyl)-11Z,13Z,15Z,17Z-octadecatetrienamide    | 30.65                | C <sub>25</sub> H <sub>35</sub> NO <sub>2</sub> | 382.2740                          | 382.2735                          | -1.454         | 364.2633, 290.2114, <b>272.2008</b> , 190.1227, 173.1071                        |
| A <sub>8</sub> <sup>*</sup>  | N-benzylbenzamide                                            | 30.71                | C <sub>14</sub> H <sub>13</sub> NO              | 212.1069                          | 212.1067                          | -0.211         | 134.0600, <b>105.0334</b> , 91.0540                                             |
| A <sub>9</sub>               | N-benyl- Sevencarbamide                                      | 32.85                | C <sub>13</sub> H <sub>19</sub> NO              | 206.1539                          | 206.1539                          | -0.052         | 128.1070, 108.0807, <b>91.0541</b> , 77.9986                                    |
| A <sub>10</sub>              | N-benzyl-2E,4E,6E-fourcarbonleukotrieneamide                 | 34.65                | C <sub>14</sub> H <sub>15</sub> NO              | 214.1226                          | 214.1226                          | -0.190         | <b>186.1279</b> , 108.0807, 91.0541                                             |
| A <sub>11</sub>              | N-benzyl-2E,4E-sixcarbondienamide                            | 35.58                | C <sub>13</sub> H <sub>13</sub> NO              | 200.1069                          | 200.1070                          | 0.347          | 172.1122, 122.0601, <b>109.0886</b> , 91.0541                                   |
| A <sub>12</sub>              | N-(3-hydroxy-benzyl)-8E,11E,13E,15E,17E-octadecapentienamide | 36.21                | C <sub>25</sub> H <sub>33</sub> NO <sub>2</sub> | 380.2584                          | 380.2584                          | 0.116          | 362.2480; 300.1957, <b>260.1646</b> , 131.0855, 91.0541                         |
| A <sub>13</sub>              | N-benzyl-octanamide                                          | 38.64                | C <sub>15</sub> H <sub>23</sub> ON              | 234.1852                          | 234.1852                          | -0.132         | 207.1127, 156.1382, 127.1117, 109.1010, <b>91.0542</b>                          |
| A <sub>14</sub>              | N-(3,4-dihydroxy-benzyl)-hexadecanamide                      | 38.80                | C <sub>22</sub> H <sub>41</sub> NO <sub>2</sub> | 364.3210                          | 364.3204                          | -1.664         | 346.2742, 282.2065, <b>149.1323</b> , 121.1011, 91.0541                         |
| A <sub>15</sub> <sup>*</sup> | N-benzyl-(9Z,12Z,15Z)-octadecatetraenamide                   | 43.62                | C <sub>25</sub> H <sub>35</sub> NO              | 366.2791                          | 366.2784                          | -1.997         | 349.2528, <b>259.2058</b> , 241.1953, 121.1012, 108.0808                        |
| A <sub>16</sub>              | N-(3-hydroxy-benzyl)-11E,13E,15E,17E-octadecatetrienamide    | 45.83                | C <sub>25</sub> H <sub>35</sub> NO <sub>2</sub> | 382.2740                          | 382.2730<br>404.2549              | -2.657         | 364.2631, 275.2002, <b>260.1642</b> , 101.0942                                  |
| A <sub>17</sub>              | N-benzyl-5-oxo-6E,8E-octadecadienamide <sup>[31]</sup>       | 47.17                | C <sub>25</sub> H <sub>37</sub> NO <sub>2</sub> | 384.2897                          | 384.2886<br>406.2704              | -2.774         | <b>366.2792</b> , 306.2421, 300.2323, 288.1959, 277.2162,<br>260.1646, 259.2057 |

|                   |                                                          |       |                                                 |          |                      |        |                                                          |
|-------------------|----------------------------------------------------------|-------|-------------------------------------------------|----------|----------------------|--------|----------------------------------------------------------|
| A <sub>18</sub>   | N-benzyl-13-oxo-9E,11E-octadecadienamide                 | 47.51 | C <sub>25</sub> H <sub>37</sub> NO <sub>2</sub> | 384.2897 | 384.2891<br>406.2707 | -1.525 | <b>366.2792</b> , 306.2430, 286.2167, 277.2163, 259.2058 |
| A <sub>19</sub>   | N-benzyl-9-oxo-12E,15Z-Octadecadienamide                 | 48.15 | C <sub>25</sub> H <sub>37</sub> NO <sub>2</sub> | 384.2897 | 384.2889<br>406.2707 | -1.993 | 366.2792, 306.2433, 277.2162, <b>260.1646</b> , 259.2058 |
| A <sub>20</sub>   | N-benzyl-9-oxo-12E,15E-Octadecadienamide                 | 48.75 | C <sub>25</sub> H <sub>37</sub> NO <sub>2</sub> | 384.2897 | 384.2885<br>406.2703 | -3.304 | 366.2792, 306.2793, 277.2163, <b>260.1646</b> , 259.2059 |
| A <sub>21</sub>   | N-butyl-14,16-dihydroxy-9E, 11E, 13E-octadecatrieneamide | 48.94 | C <sub>22</sub> H <sub>39</sub> NO <sub>3</sub> | 366.3002 | 366.2994<br>388.2811 | -2.186 | 348.2895, <b>263.2368</b> , 245.2263, 135.1167, 121.1010 |
| A <sub>22</sub>   | N-benzyl-16-hydroxy-9-oxo-3E,5E,7E-octadecatrieneamide   | 49.45 | C <sub>25</sub> H <sub>35</sub> NO <sub>3</sub> | 398.2689 | 398.2685             | -1.131 | 380.2585, 362.2491, <b>282.1853</b> , 264.1741, 246.2436 |
| A <sub>23</sub> * | N-benzyl-9-oxo-12E-octadecenamide                        | 50.25 | C <sub>25</sub> H <sub>39</sub> NO <sub>2</sub> | 386.3053 | 386.3045<br>408.2861 | -2.216 | 368.2949, <b>351.2684</b> , 333.2577, 279.2320, 261.2212 |
| A <sub>24</sub>   | N-benzyl-16-hydroxy-9-oxo-15E,17E-octadecatrieneamide    | 50.47 | C <sub>25</sub> H <sub>35</sub> NO <sub>3</sub> | 398.2689 | 398.2780             | -2.412 | <b>380.8856</b> , 368.2948, 288.2323, 170.1175           |
| A <sub>25</sub>   | N-ethyl-12-(2'-4'-)-cyclohexadiene-dodeceneamide         | 50.76 | C <sub>20</sub> H <sub>35</sub> NO              | 306.2791 | 306.2786             | -1.571 | 289.2527, <b>261.2215</b> , 243.2109, 170.1541, 95.0854  |
| A <sub>26</sub>   | 16-hydroxyl-octadecanamide                               | 51.30 | C <sub>18</sub> H <sub>37</sub> NO <sub>2</sub> | 300.2897 | 300.2889             | -2.451 | <b>283.2632</b> , 239.2369, 221.2263, 91.0540            |
| A <sub>27</sub>   | N-cyclohexane-(3'-hydroxyl)-tridecane amide              | 51.97 | C <sub>20</sub> H <sub>39</sub> NO <sub>3</sub> | 342.3002 | 342.2996             | -0.621 | <b>324.2897</b> , 239.2369, 221.2261, 109.1010, 104.0705 |
| A <sub>28</sub>   | N-(3,4-dihydroxybenzyl)-(9Z)-tetradecanamide             | 52.44 | C <sub>20</sub> H <sub>39</sub> NO <sub>2</sub> | 326.3053 | 326.3048             | -1.673 | <b>309.2786</b> , 265.2523, 247.2417, 135.1166, 121.1010 |
| A <sub>29</sub>   | N-(3,4-dihydroxy-benzyl)-(9E)-tetradecanamide            | 52.77 | C <sub>20</sub> H <sub>39</sub> NO <sub>2</sub> | 326.3053 | 326.3045             | -2.409 | <b>309.2785</b> , 265.2521, 247.2415, 135.1165, 121.1009 |
| A <sub>30</sub>   | N-benzyl-9-oxo-12N-octadecenamide                        | 52.93 | C <sub>25</sub> H <sub>39</sub> NO <sub>2</sub> | 386.3053 | 386.3045             | -2.138 | 369.2789, <b>351.2681</b> , 263.2370, 245.2264, 107.0491 |
| A <sub>31</sub>   | N-benzyl-8E, 10E-hexadecadienamide                       | 53.53 | C <sub>23</sub> H <sub>35</sub> NO              | 342.2791 | 342.2782             | 0.941  | 325.2526, 235.2058, <b>217.1952</b> , 190.1228, 91.0541  |
| A <sub>32</sub> * | N-(3-methoxybenzyl)-(9Z,12Z,15Z)-octadecatrieneamide     | 54.55 | C <sub>26</sub> H <sub>39</sub> NO <sub>2</sub> | 398.3053 | 398.3031<br>420.2843 | 1.126  | <b>381.2788</b> , 290.2116, 261.2214, 243.2108, 121.0648 |
| A <sub>33</sub>   | N-ethyl-(9E,11E)-octadecadienamide                       | 54.67 | C <sub>20</sub> H <sub>37</sub> NO              | 308.2947 | 308.2942             | 1.756  | 263.2371, <b>245.2265</b> , 238.2167, 109.1011, 95.0854  |
| A <sub>34</sub>   | N-benzyl-(9Z,12Z,15Z)-octadecatrienamide                 | 54.98 | C <sub>25</sub> H <sub>37</sub> NO              | 368.2947 | 368.2929<br>390.2743 | 1.851  | <b>351.2678</b> , 333.2573, 261.2211, 243.2105, 121.1010 |

|                   |                                                     |       |                                                 |          |                      |        |                                                                             |
|-------------------|-----------------------------------------------------|-------|-------------------------------------------------|----------|----------------------|--------|-----------------------------------------------------------------------------|
| A <sub>35</sub>   | N-benzyl-9Z,12Z-hexadecadienamide                   | 55.98 | C <sub>24</sub> H <sub>37</sub> NO              | 356.2947 | 356.2943             | -1.267 | 339.2675, 249.2209, <b>231.2103</b> , 218.1535, 91.0539                     |
| A <sub>36</sub>   | N-benzyl-tetradeceneamide                           | 56.10 | C <sub>21</sub> H <sub>35</sub> NO              | 318.2791 | 318.2786             | -0.451 | 240.2323, <b>211.2058</b> , 193.1951, 123.1168, 91.0540                     |
| A <sub>37</sub>   | N-(3-methoxybenzyl)-(9Z)-benzylhexadecanamide       | 56.16 | C <sub>23</sub> H <sub>39</sub> NO <sub>2</sub> | 362.3053 | 362.3046             | -1.838 | 268.2634, 254.2477, 239.2369, 137.1324, <b>107.0490</b> , 91.9698           |
| A <sub>38</sub>   | N-benzyl-13-oxo-11E-heptadecenamide                 | 56.73 | C <sub>24</sub> H <sub>39</sub> NO <sub>2</sub> | 374.3053 | 374.3049             | -0.978 | 357.2782, 266.2474, 248.1641, 138.0911, <b>121.0646</b>                     |
| A <sub>39</sub>   | N-benzyl-9E,12E-hexadecadienamide                   | 56.83 | C <sub>24</sub> H <sub>37</sub> NO              | 356.2947 | 356.2941             | -1.940 | 339.2677, 309.2977, 249.2210, <b>231.2104</b> , 218.1380, 116.0704, 91.0539 |
| A <sub>40</sub>   | N-benzyl-16-hydroxy-9-oxo-13E,15E-octadecadienamide | 56.92 | C <sub>25</sub> H <sub>41</sub> NO <sub>2</sub> | 388.3210 | 388.3203             | -1.715 | 371.2937, 280.2630, 265.2522, 247.2417, <b>124.0755</b> , 107.0489          |
| A <sub>41</sub>   | N-benzyl-4E-hexadecenamide                          | 57.21 | C <sub>23</sub> H <sub>37</sub> NO              | 344.2947 | 344.2944             | -0.301 | 288.2322, 274.2165, 246.1852, <b>219.2103</b> , 91.0540                     |
| A <sub>42</sub>   | N-benzyl-4Z-hexadecenamide                          | 57.64 | C <sub>23</sub> H <sub>37</sub> NO              | 344.2947 | 344.2939             | -2.357 | 288.2317, 274.2161, 246.1848, <b>219.2103</b> , 91.0539                     |
| A <sub>43</sub> * | N-(3-methoxybenzyl)-(9Z,12Z)-octadecadienamide      | 58.14 | C <sub>26</sub> H <sub>41</sub> NO <sub>2</sub> | 400.3210 | 400.3210<br>422.3028 | -0.026 | <b>383.2948</b> , 365.2840, 278.2478, 245.2264, 138.0914<br>121.0648        |
| A <sub>44</sub>   | N-octadecanamide                                    | 58.39 | C <sub>18</sub> H <sub>37</sub> NO              | 284.2947 | 284.2938             | -3.206 | 256.2636, 158.1540, 144.1384, 130.1228, <b>116.1070</b>                     |
| A <sub>45</sub>   | N-benzyl-(9Z,12Z)-octadecadienamide <sup>[29]</sup> | 58.60 | C <sub>25</sub> H <sub>39</sub> NO              | 370.3091 | 370.3091<br>392.2903 | -0.595 | 353.2840, 278.2480, 263.2371, <b>245.2265</b> , 232.1696, 218.1541          |
| A <sub>46</sub>   | N-benzylpentadecanamide                             | 59.12 | C <sub>22</sub> H <sub>37</sub> NO              | 332.2533 | 332.2938             | 2.833  | 254.2480, <b>225.2480</b> , 207.2107, 137.1325, 123.1168                    |
| A <sub>47</sub>   | N-ethyl-(2E,16E)-octadecadienamide                  | 59.12 | C <sub>20</sub> H <sub>39</sub> NO              | 310.3104 | 310.3101             | -1.036 | 265.2527, 254.2479, <b>247.2421</b> , 95.0854                               |
| A <sub>48</sub>   | N-(3,4-dimethoxybenzyl)-hexadecanamide              | 59.93 | C <sub>25</sub> H <sub>43</sub> NO <sub>3</sub> | 406.3315 | 406.3274             | -4.091 | 391.2822, 375.2487, 305.0555, <b>91.5041</b>                                |
| A <sub>49</sub>   | N-benzyl-14E,8E-eicosenoicdienamide                 | 60.12 | C <sub>22</sub> H <sub>39</sub> NO              | 334.3104 | 334.3099             | 1.500  | 292.2634, 278.2477, 238.2165, 196.1696, <b>182.1537</b> , 109.1011          |
| A <sub>50</sub>   | N-benzyl-9Z,12Z-heptadecadienamide                  | 60.24 | C <sub>24</sub> H <sub>39</sub> NO              | 358.3104 | 358.3099             | -1.483 | 341.2838, 251.2370, <b>233.2264</b> , 218.1540, 91.0540                     |
| A <sub>51</sub>   | N-benzyl-9Z,12Z-nonadecadienamide                   | 61.09 | C <sub>26</sub> H <sub>41</sub> NO              | 384.3260 | 384.3255             | -1.305 | <b>367.2990</b> , 292.2632, 259.2417, 246.1849, 232.1693                    |
| A <sub>52</sub> * | N-(3-methoxybenzyl)-hexadecanamide                  | 61.49 | C <sub>24</sub> H <sub>41</sub> NO <sub>2</sub> | 376.3210 | 376.3199             | -2.806 | 360.0393, 268.2636, 239.2370, 138.0914, <b>121.0648</b>                     |
| A <sub>53</sub>   | N-(3-methoxybenzyl)-(9E)-octadecenamide             | 61.95 | C <sub>26</sub> H <sub>43</sub> NO <sub>2</sub> | 402.3366 | 402.3347             | -4.738 | 385.3099, 367.2991, 294.2789, 247.2417, <b>121.0647</b>                     |
| A <sub>54</sub> * | N-benzylhexadecanamide <sup>[29]</sup>              | 62.10 | C <sub>23</sub> H <sub>39</sub> NO              | 346.3104 | 346.3096             | -1.361 | 268.2633, <b>239.2368</b> , 221.2262, 137.1324, 109.1011                    |

|                   |                                            |       |                                                 |          | 368.2912  |        |                                                                    |  |
|-------------------|--------------------------------------------|-------|-------------------------------------------------|----------|-----------|--------|--------------------------------------------------------------------|--|
| A <sub>55</sub>   | N-(3-methoxybenzyl)-(9Z)-octadecenamide    | 62.23 | C <sub>26</sub> H <sub>43</sub> NO <sub>2</sub> | 402.3366 | 402.3360  | -1.631 | 385.3103, 265.2526, 247.2421, 138.0914, <b>121.0648</b>            |  |
| A <sub>56</sub>   | N-benzyl-9Z-octadecenamide <sup>[29]</sup> | 62.53 | C <sub>25</sub> H <sub>41</sub> NO              | 372.3260 | 372.3249  | -3.066 | 355.2995, 294.2792, 265.2527, <b>247.2422</b> , 135.1168           |  |
| A <sub>57</sub>   | N-benzyl-10E,12E-twenty carbondienamide    | 63.46 | C <sub>27</sub> H <sub>43</sub> NO              | 398.3417 | 398.34125 | 1.234  | <b>381.3150</b> , 316.2631, 306.2790, 302.2476, 273.2576           |  |
| A <sub>58</sub>   | N-benzylheptadecanamide <sup>[29]</sup>    | 63.83 | C <sub>24</sub> H <sub>41</sub> NO              | 360.3260 | 360.3256  | -1.225 | 282.2792, 253.2525, 235.2419, 137.1324, <b>123.1168</b>            |  |
| A <sub>59</sub>   | N-benzyl-12Z-nonadecenamide                | 64.51 | C <sub>26</sub> H <sub>43</sub> NO              | 386.3417 | 386.3410  | -1.842 | 369.2786, <b>316.2630</b> , 279.2317, 261.2211, 124.0756, 107.0490 |  |
| A <sub>60</sub>   | N-benzylheptadecanamide                    | 64.89 | C <sub>24</sub> H <sub>41</sub> NO              | 360.3260 | 360.3248  | -3.854 | 282.2787, 253.2522, 235.2416, 137.1322, <b>123.1165</b>            |  |
| A <sub>61</sub>   | N-benzyl-12E-nonadecenamide                | 65.32 | C <sub>26</sub> H <sub>43</sub> NO              | 386.3417 | 386.3408  | -2.230 | 369.2786, 279.2317, <b>261.2211</b> , 124.0756, 107.0490           |  |
| A <sub>62</sub> * | N-benzyl octadecanamide                    | 67.22 | C <sub>25</sub> H <sub>43</sub> NO              | 374.3417 | 374.3414  | -0.772 | 296.3171, 267.2619, 249.2857, 137.1380, <b>123.1394</b>            |  |
| A <sub>63</sub>   | N-benzyl octadecanamide                    | 68.33 | C <sub>25</sub> H <sub>43</sub> NO              | 374.3417 | 374.3404  | -4.252 | 296.2946, 267.2681, 249.2573, 137.1323, <b>123.1166</b>            |  |
| A <sub>64</sub>   | N-benzyl twenty carboxamide                | 78.12 | C <sub>27</sub> H <sub>47</sub> NO              | 402.3730 | 402.3704  | -0.632 | 324.3243, 295.2979, 277.2874, 137.1316, <b>123.1160</b>            |  |

\*Structures confirmed by comparison with reference standards. Bold characters: the base peaks in MS<sup>n</sup> spectra

Table S2 Identification of Macaridines from Maca by UHPLC-ESI-Orbitrap MS

| NO                | name                                                   | t <sub>R</sub> (min) | Formula                                         | ESI(+)/expected<br>(m/z) | ESI(+)/measure<br>d<br>(m/z) | Delta<br>(ppm) | Fragamentor information                                 |
|-------------------|--------------------------------------------------------|----------------------|-------------------------------------------------|--------------------------|------------------------------|----------------|---------------------------------------------------------|
| A <sub>65</sub>   | 3-benzyl-1,2-dihydro-N-hydroxypyridine-4-met hoxy      | 24.33                | C <sub>13</sub> H <sub>15</sub> NO <sub>2</sub> | 218.1175                 | 218.1174                     | -0.437         | 200.1279, 159.3215, 126.0550, 112.0756, <b>91.0541</b>  |
| A <sub>66</sub> * | 3-benzyl-1,2-dihydro-N-hydroxypyridine-4-car baldehyde | 27.12                | C <sub>13</sub> H <sub>13</sub> NO <sub>2</sub> | 216.1019                 | 216.1018                     | -0.302         | <b>198.0915</b> , 188.1071, 170.0965, 158.0965, 91.0541 |
| A <sub>67</sub> * | (3-methoxybenzyl)-N-pyridine-4-carbaldehyde            | 27.56                | C <sub>14</sub> H <sub>13</sub> NO <sub>2</sub> | 228.1019                 | 228.1012                     | -3.048         | <b>200.1072</b> , 169.0887, 132.4082, 121.0649          |

\*Structures confirmed by comparison with reference standards. Bold characters: the base peaks in MS<sup>n</sup> spectra

Table S3 Identification of Imidazole alkaloids from Maca by UHPLC-ESI-Orbitrap MS

| NO              | name                                                     | t <sub>R</sub> (min) | Formula                                        | ESI(+)/expected<br>( <i>m/z</i> ) | ESI(+)/measured<br>( <i>m/z</i> ) | Delta<br>(ppm) | Fragamentor information                                 |
|-----------------|----------------------------------------------------------|----------------------|------------------------------------------------|-----------------------------------|-----------------------------------|----------------|---------------------------------------------------------|
| A <sub>68</sub> | 1-dibenzylimidazilium                                    | 15.70                | C <sub>8</sub> H <sub>12</sub> N <sub>2</sub>  | 137.1073                          | 137.1073                          | 0.255          | 124.4250, <b>109.0646</b> , 91.0538, 77.9985            |
| A <sub>69</sub> | 1-dibenzyl-4,5-dimethylimidazilium                       | 19.46                | C <sub>12</sub> H <sub>14</sub> N <sub>2</sub> | 187.1229                          | 187.1229                          | -0.187         | 159.0803, 109.0759, <b>91.0541</b>                      |
| A <sub>70</sub> | 1-dibenzyl-trimethylimidazilium                          | 20.49                | C <sub>13</sub> H <sub>16</sub> N <sub>2</sub> | 201.1386                          | 201.1386                          | 0.065          | 160.1120, 121.1435, 109.0760, <b>91.0541</b>            |
| A <sub>71</sub> | 1-dibenzyl-2-ethyl-4,5-dimethylimidazilium               | 20.91                | C <sub>14</sub> H <sub>18</sub> N <sub>2</sub> | 215.1542                          | 215.1542                          | 0.002          | 187.1230, 137.1073, 123.0917, 109.0761, <b>91.0541</b>  |
| A <sub>72</sub> | 1-dibenzyl-2-propane-4,5-dimethylimidazilium             | 21.12                | C <sub>15</sub> H <sub>18</sub> N <sub>2</sub> | 227.1542                          | 227.1543                          | 0.109          | <b>135.0917</b> , 91.0540                               |
| A <sub>73</sub> | 1-dibenzyl-2-propyne-4,5-dimethylimidazilium             | 21.82                | C <sub>15</sub> H <sub>16</sub> N <sub>2</sub> | 225.1386                          | 225.1387                          | 0.333          | 208.1120, 181.1011, 130.0651, <b>91.0541</b>            |
| A <sub>74</sub> | 1-dibenzyl-2-propane-4,5-dimethylimidazilium             | 21.94                | C <sub>15</sub> H <sub>20</sub> N <sub>2</sub> | 229.1699                          | 229.1696                          | -1.026         | 188.1433, <b>137.1073</b> , 121.6014, 91.0540           |
| A <sub>75</sub> | 1-dibenzyl-2-butene-4,5-dimethylimidaziliumc             | 22.41                | C <sub>16</sub> H <sub>20</sub> N <sub>2</sub> | 241.1699                          | 241.1698                          | -0.270         | <b>149.1072</b> , 121.0653, 91.0539                     |
| A <sub>76</sub> | 1-dibenzyl-2-isopropane-4,5-dimethylimidazilium          | 23.37                | C <sub>15</sub> H <sub>20</sub> N <sub>2</sub> | 229.1699                          | 229.1696                          | -1.201         | 187.1229, 160.1119, <b>137.1073</b> , 123.0915, 91.0540 |
| A <sub>77</sub> | 1-dibenzyl-2-(1,3-butadiene)-4,5-dimethylimidazilium     | 23.53                | C <sub>16</sub> H <sub>18</sub> N <sub>2</sub> | 239.1542                          | 239.1542                          | 0.005          | 198.1278, 181.1013, 158.7507, <b>91.0541</b>            |
| A <sub>78</sub> | 1-dibenzyl-2-butyl-4,5-dimethylimidazilium               | 25.10                | C <sub>16</sub> H <sub>22</sub> N <sub>2</sub> | 243.1855                          | 243.1855                          | -0.104         | <b>187.1229</b> , 160.1118, 151.1229, 91.0541           |
| A <sub>79</sub> | 1-dibenzyl-2-phenyl-4,5-dimethylimidazilium              | 25.45                | C <sub>18</sub> H <sub>18</sub> N <sub>2</sub> | 263.1542                          | 263.1543                          | 0.208          | 185.1073, <b>171.0917</b> , 160.1120, 144.1019, 91.0541 |
| A <sub>80</sub> | 1-dibenzyl-2-isobutyl-4,5-dimethylimidazilium            | 25.64                | C <sub>16</sub> H <sub>22</sub> N <sub>2</sub> | 243.1855                          | 243.1851                          | -1.667         | <b>187.1228</b> , 160.1119, 151.1228, 91.0539           |
| A <sub>81</sub> | 1-dibenzyl-2-(2-pentynylalkenyl)-4,5-dimethylimidazilium | 25.93                | C <sub>17</sub> H <sub>18</sub> N <sub>2</sub> | 251.1542                          | 251.1541                          | -0.105         | 234.1126, 187.0754, 158.0966, 132.0809, <b>91.0541</b>  |
| A <sub>82</sub> | 1,3-dibenzyl-4,5-dimethylimidazolium                     | 26.69                | C <sub>19</sub> H <sub>20</sub> N <sub>2</sub> | 277.1699                          | 277.1691                          | -2.761         | 262.1521, 199.1231, <b>185.1075</b> , 109.0760, 91.0541 |
| A <sub>83</sub> | 1,3-dibenzyl-2,4,5-trimethylimidazilium                  | 27.38                | C <sub>20</sub> H <sub>22</sub> N <sub>2</sub> | 291.1855                          | 291.1849                          | -2.285         | 250.1593, 199.1233, 158.0965, 117.0698, <b>91.0542</b>  |
| A <sub>84</sub> | 1,3-dibenzyl-2(R)-ethyl-4,5-dimethylimidazilium          | 28.84                | C <sub>21</sub> H <sub>24</sub> N <sub>2</sub> | 305.2012                          | 305.2011                          | -0.280         | 250.1593, <b>213.1386</b> , 185.1074, 123.0917, 91.0542 |
| A <sub>85</sub> | 1,3-dibenzyl-2-(1,3-diacetylene)-4,5-dimethylimidazilium | 29.48                | C <sub>23</sub> H <sub>20</sub> N <sub>2</sub> | 325.1699                          | 325.1697                          | -0.155         | 277.2164, 201.1026, 158.0965, 121.0649, <b>91.0541</b>  |
| A <sub>86</sub> | 1,3-dibenzyl-2-vinyl-4,5-dimethylimidazilium             | 29.64                | C <sub>21</sub> H <sub>22</sub> N <sub>2</sub> | 303.1855                          | 303.1855                          | -0.182         | 211.1228, <b>185.1073</b> , 173.1071, 131.0854, 91.0540 |



|                  |                                                                     |       |                                                |          |          |        |                                                                             |
|------------------|---------------------------------------------------------------------|-------|------------------------------------------------|----------|----------|--------|-----------------------------------------------------------------------------|
| A <sub>87</sub>  | 1,3-dibenzyl-2(S)-ethyl-4,5-dimethylimidazilium                     | 30.03 | C <sub>21</sub> H <sub>24</sub> N <sub>2</sub> | 305.2012 | 305.2011 | -0.280 | <b>213.1389</b> , 185.1075, 137.1075, 91.0542                               |
| A <sub>88</sub>  | 1-dibenzyl-2-heptyl-4,5-dimethylimidazilium                         | 30.03 | C <sub>19</sub> H <sub>28</sub> N <sub>2</sub> | 285.2325 | 285.2323 | -0.790 | 267.1495, 193.1701, 138.1152, <b>91.0541</b>                                |
| A <sub>89</sub>  | 1,3-dibenzyl-2-propyl-4,5-dimethylimidazilium                       | 30.25 | C <sub>22</sub> H <sub>26</sub> N <sub>2</sub> | 319.2168 | 319.2166 | -1.301 | <b>227.1543</b> , 200.1310, 185.1075, 158.0965, 137.1074, 91.0541           |
| A <sub>90</sub>  | 1,3-dibenzyl-2(1,3-glutaricalkynyl)-dimethylimidazilium             | 30.28 | C <sub>24</sub> H <sub>22</sub> N <sub>2</sub> | 339.1855 | 339.1385 | -0.458 | 261.1385, <b>247.1230</b> , 181.1011, 158.0961, 91.0542                     |
| A <sub>91</sub>  | 1,3-dibenzyl-2-isopropyl-4,5-dimethylimidaziliumchloride            | 30.50 | C <sub>22</sub> H <sub>26</sub> N <sub>2</sub> | 319.2168 | 319.2166 | -1.301 | 278.1904, <b>227.1544</b> , 200.1309, 181.1012, 91.0541                     |
| A <sub>92</sub>  | 1-dibenzyl-2-isoheptyl-4,5-dimethylimidazilium                      | 30.75 | C <sub>19</sub> H <sub>28</sub> N <sub>2</sub> | 285.2325 | 285.2320 | -1.632 | 268.1331, 204.1212, 160.0756, 121.0647, <b>91.0540</b>                      |
| A <sub>93</sub>  | 1,3-dibenzyl-2-propenyl-4,5-dimethylimidazilium                     | 30.75 | C <sub>22</sub> H <sub>24</sub> N <sub>2</sub> | 317.2012 | 317.2010 | -0.205 | 308.7192, 181.1011, 158.0964, 135.0916, <b>131.0855</b> , 109.0759, 91.0540 |
| A <sub>94</sub>  | 1,3-dibenzyl-2-phenyl-4,5-dimethylimidazilium                       | 31.00 | C <sub>25</sub> H <sub>24</sub> N <sub>2</sub> | 353.2012 | 353.2007 | -1.261 | 275.1544, <b>185.1073</b> , 171.0917, 158.0965, 121.0653, 91.0541           |
| A <sub>95</sub>  | 1,3-dibenzyl-2-butyl-4,5-dimethylimidazilium                        | 31.34 | C <sub>23</sub> H <sub>28</sub> N <sub>2</sub> | 333.2325 | 333.2321 | -1.217 | 277.1698, 250.1591, <b>241.1699</b> , 200.1309, 185.1073, 158.0963, 91.0522 |
| A <sub>96</sub>  | 1,3-dibenzyl-2-isobutyl-4,5-dimethylimidazilium                     | 31.69 | C <sub>23</sub> H <sub>28</sub> N <sub>2</sub> | 333.2325 | 333.2324 | -0.136 | 277.1700, 250.1591, <b>241.1700</b> , 200.1310, 185.1074, 158.0964, 91.0521 |
| A <sub>97</sub>  | 1-dibenzyl-2-(5-en-1,3-heptadiyne)-4,5-dimethylimidazilium          | 32.91 | C <sub>26</sub> H <sub>24</sub> N <sub>2</sub> | 365.2012 | 365.2009 | -0.809 | 310.7103, 287.1543, <b>185.1074</b> , 91.6150                               |
| A <sub>98</sub>  | 1,3-dibenzyl-2-(5-en-1,3-propylenealkyne)-4,5-dimethylimidazilium   | 32.98 | C <sub>27</sub> H <sub>26</sub> N <sub>2</sub> | 379.2168 | 379.2164 | -1.016 | <b>288.1619</b> , 273.1383, 256.1886, 199.1228, 178.0775                    |
| A <sub>99</sub>  | 1,3-dibenzyl-2-pentyl-4,5-dimethylimidazilium                       | 33.17 | C <sub>24</sub> H <sub>30</sub> N <sub>2</sub> | 347.2481 | 347.2479 | -0.186 | 277.1702, <b>255.1857</b> , 227.1544, 200.1310, 158.0965, 91.0524           |
| A <sub>100</sub> | 1,3-dibenzyl-2-(3,5,7-trienepropyne)-4,5-dimethylimidazilium        | 33.32 | C <sub>27</sub> H <sub>26</sub> N <sub>2</sub> | 379.2168 | 379.2169 | 0.118  | <b>288.1619</b> , 273.1383, 256.1886, 199.1228, 115.0540                    |
| A <sub>101</sub> | 1-(3,5-cyclohexadiene)-cyclohexyl-2-hexyl-4,5-dimethylimidazilium   | 33.48 | C <sub>21</sub> H <sub>35</sub> N <sub>2</sub> | 316.2873 | 316.2842 | -3.962 | <b>298.2738</b> , 280.2633, 262.2525, 109.1010, 91.0541                     |
| A <sub>102</sub> | 1-dibenzyl-3-cyclohexyl-2-isopropenyl-4,5-dimethylimidazilium       | 33.48 | C <sub>21</sub> H <sub>35</sub> N <sub>2</sub> | 316.2846 | 316.2843 | -1.487 | <b>298.2738</b> , 280.2633, 245.2261, 109.1010                              |
| A <sub>103</sub> | 1-(1,3-cyclohexadiene)-3-cyclohexyl-2-hexyl-4,5-dimethylimidazilium | 33.93 | C <sub>21</sub> H <sub>35</sub> N <sub>2</sub> | 316.2873 | 316.2840 | -3.211 | <b>298.2739</b> , 280.2634, 262.2527, 109.1012, 91.0541                     |
| A <sub>104</sub> | 1-dibenzyl-3-cyclohexyl-2-propenyl-4,5-dimethylimidazilium          | 33.93 | C <sub>21</sub> H <sub>35</sub> N <sub>2</sub> | 316.2846 | 316.2841 | -2.962 | <b>298.2739</b> , 280.2633, 245.2260, 135.1166, 109.1009                    |

ylimidazolium

|                  |                                              |       |                                                |          |          |        |                                                                                       |
|------------------|----------------------------------------------|-------|------------------------------------------------|----------|----------|--------|---------------------------------------------------------------------------------------|
| A <sub>105</sub> | 1,3-dibenzyl-2-hexyl-4,5-dimethylimidazolium | 34.65 | C <sub>25</sub> H <sub>32</sub> N <sub>2</sub> | 361.2638 | 361.2637 | -0.348 | 269.2014, 250.1591, 213.1387, 200.1309, <b>185.1073</b> , 123.0916, 109.0759, 91.0517 |
|------------------|----------------------------------------------|-------|------------------------------------------------|----------|----------|--------|---------------------------------------------------------------------------------------|

\* Structures confirmed by comparison with reference standards. Bold characters: the base peaks in MS<sup>n</sup> spectra

Table S4 Identification of β-carboline alkaloids from Maca by UHPLC-ESI-Orbitrap MS

| NO               | name                                                                           | t <sub>R</sub> (min) | Formula                                                       | ESI(+)/expected<br>(m/z) | ESI(+)/measured<br>(m/z) | Delta<br>(ppm) | Fragamentor information                                                            |
|------------------|--------------------------------------------------------------------------------|----------------------|---------------------------------------------------------------|--------------------------|--------------------------|----------------|------------------------------------------------------------------------------------|
| A <sub>106</sub> | (1R,3S)-1-methyltetrahydro-β-5,6-hydridercarboline-3-carboxylic acid           | 14.71                | C <sub>13</sub> H <sub>16</sub> N <sub>2</sub> O <sub>2</sub> | 233.1284                 | 233.1283                 | -0.490         | 215.1176, <b>116.0705</b> , 91.0539, 70.0648                                       |
| A <sub>107</sub> | (3S)-tetrahydro-β-4,5-hydridercarboline-2-carboxylic acid                      | 15.08                | C <sub>11</sub> H <sub>12</sub> N <sub>2</sub> O <sub>2</sub> | 205.0971                 | 205.0968                 | -1.727         | <b>188.0708</b> , 159.0917, 146.0600, 132.0807, 112.0667                           |
| A <sub>108</sub> | (1S,3S)-1-methyltetrahydro-β-5,6-hydridercarboline-3-carboxylic acid           | 16.82                | C <sub>13</sub> H <sub>16</sub> N <sub>2</sub> O <sub>2</sub> | 233.1284                 | 233.1284                 | 0.110          | 215.1178, 187.1229, 142.0862, <b>116.0706</b> , 91.0540                            |
| A <sub>109</sub> | (1R,3S)-tetrahydro-β-5,6-hydridercarboline-3-carboxylic acid                   | 17.08                | C <sub>12</sub> H <sub>12</sub> N <sub>2</sub> O <sub>2</sub> | 217.0971                 | 217.0970                 | -0.572         | 200.0706, 171.0917, <b>144.0808</b> , 121.0673, 91.0540                            |
| A <sub>110</sub> | (1R,3S)-1-methyltetrahydro-β-carboline-3-carboxylic acid                       | 17.56                | C <sub>13</sub> H <sub>14</sub> N <sub>2</sub> O <sub>2</sub> | 231.1128                 | 231.1126                 | -0.711         | <b>214.0863</b> , 188.0707, 158.0965, 144.0808, 130.0652, 91.0540                  |
| A <sub>111</sub> | (1R,3S)-1-ethyltetrahydro-β-5,6-carboline-3-carboxylic acid                    | 18.21                | C <sub>14</sub> H <sub>16</sub> N <sub>2</sub> O <sub>2</sub> | 245.1284                 | 245.1284                 | -0.099         | 228.1021, 199.1231, <b>153.0659</b> , 138.1107, 121.0648, 109.0760, <b>91.0541</b> |
| A <sub>112</sub> | (1R,3S)-1-butanetetrahydro-β-5,6-hydridercarboline-3-carboxylic acid           | 19.02                | C <sub>16</sub> H <sub>18</sub> N <sub>2</sub> O <sub>2</sub> | 271.1441                 | 271.1436                 | -1.786         | 252.1226, <b>179.0814</b> , 135.0915, 91.0540                                      |
| A <sub>113</sub> | (1R,3S)-1-pentanetetrahydro-β-5,6-carboline-3-carboxylic acid                  | 19.59                | C <sub>17</sub> H <sub>20</sub> N <sub>2</sub> O <sub>2</sub> | 285.1597                 | 285.1597                 | 0.125          | 267.1493, 239.1544, 193.0973, <b>177.1024</b> , 135.0918, 91.0541                  |
| A <sub>114</sub> | (1R,3S)-1-butanetetrahydro-β-5,6-hydridercarboline-3-carboxylic acid           | 20.17                | C <sub>16</sub> H <sub>20</sub> N <sub>2</sub> O <sub>2</sub> | 273.1597                 | 273.1597                 | 0.130          | 255.1492, <b>187.1230</b> , 121.0646, 109.0759, 91.0541                            |
| A <sub>115</sub> | (1R,3S)-1-pentanetetrahydro-β-5,6-hydridercarboline-3-carboxylic acid          | 21.06                | C <sub>17</sub> H <sub>22</sub> N <sub>2</sub> O <sub>2</sub> | 287.1754                 | 287.1750                 | -1.130         | 246.1486, <b>201.1386</b> , 195.1127, 109.0758, 91.0539                            |
| A <sub>116</sub> | (1R,3S)-1-(2-methylbutane)tetrahydro-β-5,6-hydridercarboline-3-carboxylic acid | 22.73                | C <sub>17</sub> H <sub>22</sub> N <sub>2</sub> O <sub>2</sub> | 287.1754                 | 287.1749                 | -1.443         | 241.1698, <b>195.1127</b> , 187.1229, 109.0759, 91.0540                            |

|                               |                                                                                    |       |                                                               |          |          |        |                                                         |
|-------------------------------|------------------------------------------------------------------------------------|-------|---------------------------------------------------------------|----------|----------|--------|---------------------------------------------------------|
| A <sub>117</sub>              | (1R,3S)-1-hexyltetrahydro-β-5,6-hydridercarboline-3-carboxylic acid                | 23.73 | C <sub>18</sub> H <sub>24</sub> N <sub>2</sub> O <sub>2</sub> | 301.1910 | 301.1908 | -0.546 | <b>283.1804</b> , 260.1642, 209.1285, 121.0647, 91.0540 |
| A <sub>118</sub>              | (1R,3S)-1-(3-methylpentane)tetrahydro-β-5,6-hydridercarboline-3-carboxylic acid    | 24.62 | C <sub>18</sub> H <sub>24</sub> N <sub>2</sub> O <sub>2</sub> | 301.1910 | 301.1908 | -0.546 | 255.1853, 209.1284, <b>187.1229</b> , 121.0646, 91.0540 |
| A <sub>119</sub>              | (1R,3S)-1-(1,2-dimethylbutane)tetrahydro-β-5,6-hydridercarboline-3-carboxylic acid | 24.90 | C <sub>18</sub> H <sub>24</sub> N <sub>2</sub> O <sub>2</sub> | 301.1910 | 301.1907 | -1.177 | 255.1853, 209.1283, <b>187.1229</b> , 109.0757, 91.0540 |
| A <sub>120</sub>              | (1R,3S)-1-isobutanetetrahydro-β-5,6-hydridercarboline-3-carboxylic acid            | 30.47 | C <sub>16</sub> H <sub>18</sub> N <sub>2</sub> O <sub>2</sub> | 271.1441 | 271.1438 | -0.791 | 211.1118, 138.0913, 121.0647, 108.0807, <b>91.0540</b>  |
| A <sub>121</sub> <sup>*</sup> | (1R,3S)-1-methyl-β-carboline-3-carbaldehyde                                        | 32.59 | C <sub>13</sub> H <sub>10</sub> N <sub>2</sub> O              | 211.0865 | 211.0865 | -0.140 | 193.07689, <b>185.0716</b> , 169.0767                   |

<sup>\*</sup>Structures confirmed by comparison with reference standards. Bold characters: the base peaks in MS<sup>n</sup> spectra

Table S5 Identification of Acids from Maca by UHPLC-ESI-Orbitrap MS

| NO                          | name                                       | t <sub>R</sub> (min) | Formula                                       | ESI(-)/expected<br>(m/z) | ESI(-)/measured<br>(m/z) | Delta<br>(ppm) | Fragamentor information                       |
|-----------------------------|--------------------------------------------|----------------------|-----------------------------------------------|--------------------------|--------------------------|----------------|-----------------------------------------------|
| C <sub>1</sub> <sup>*</sup> | 3-methoxyphenylacetic acid                 | 2.17                 | C <sub>9</sub> H <sub>10</sub> O <sub>3</sub> | 165.0462                 | 165.0403                 | 0.184          | 147.0304, <b>129.0197</b> , 75.0091           |
| C <sub>2</sub> <sup>*</sup> | 2,4-dihydroxy-3,5-cyclopentyl dienoic acid | 2.33                 | C <sub>6</sub> H <sub>7</sub> O <sub>4</sub>  | 143.0338                 | 143.0333                 | -3.812         | <b>69.0328</b>                                |
| C <sub>3</sub> <sup>*</sup> | Nicotinic acid                             | 3.98                 | C <sub>6</sub> H <sub>5</sub> NO <sub>2</sub> | 122.0245                 | 122.0245                 | 0.007          | 102.2594, <b>78.0348</b> , 66.0872, 53.6929   |
| C <sub>4</sub> <sup>*</sup> | 4-hydroxy-3-methoxybenzoic acid            | 5.31                 | C <sub>8</sub> H <sub>8</sub> O <sub>4</sub>  | 167.0339                 | 167.0203                 | -0.979         | <b>152.0114</b> , 123.0451, 108.0217, 95.0137 |
| C <sub>5</sub> <sup>*</sup> | Succinic acid                              | 6.80                 | C <sub>4</sub> H <sub>6</sub> O <sub>4</sub>  | 117.0182                 | 117.0189                 | 4.280          | <b>99.0088</b> , 73.0295                      |

Table S6 Identification of Glucosinolates from Maca by UHPLC-ESI-Orbitrap MS

| NO                          | name                          | t <sub>R</sub> (min) | Formula                                                         | ESI(-)/expected<br>(m/z) | ESI(-)/measured<br>(m/z) | Delta<br>(ppm) | Fragamentor information                                                      |
|-----------------------------|-------------------------------|----------------------|-----------------------------------------------------------------|--------------------------|--------------------------|----------------|------------------------------------------------------------------------------|
| G <sub>1</sub>              | indolyl-3-methylglucosinolate | 10.65                | C <sub>15</sub> H <sub>29</sub> O <sub>10</sub> NS <sub>2</sub> | 446.1154                 | 446.1115                 | -3.859         | 424.0449, 383.1183, <b>274.9914</b> , 249.9780, 164.0169                     |
| G <sub>2</sub>              | indolyl-5-methylglucosinolate | 11.53                | C <sub>15</sub> H <sub>29</sub> O <sub>10</sub> NS <sub>2</sub> | 446.1154                 | 446.1116                 | -3.658         | 424.0466, 383.1354, <b>274.9914</b> , 249.9784, 164.0171                     |
| G <sub>3</sub> <sup>*</sup> | m-methoxybenzylglucosinolate  | 11.99                | C <sub>15</sub> H <sub>20</sub> O <sub>10</sub> NS <sub>2</sub> | 438.0523                 | 438.0503                 | -4.551         | 358.0956, 274.9897, <b>259.0126</b> , 242.0125, 227.0225, 196.0435, 163.0609 |

|                  |                                                   |       |                                                                               |          |                      |        |                                                                                         |
|------------------|---------------------------------------------------|-------|-------------------------------------------------------------------------------|----------|----------------------|--------|-----------------------------------------------------------------------------------------|
| G <sub>4</sub>   | p-methoxybenzylglucosinolate                      | 12.89 | C <sub>15</sub> H <sub>20</sub> O <sub>10</sub> NS <sub>2</sub>               | 438.0523 | 438.0508             | -4.616 | 358.0957, 274.9898, <b>259.0127</b> , 242.0127, 227.0226, 196.0437, 163.0610            |
| G <sub>5</sub> * | benzylglucosinolate                               | 14.96 | C <sub>14</sub> H <sub>19</sub> O <sub>9</sub> NS <sub>2</sub>                | 408.0423 | 408.0399             | -4.679 | 328.0852, 274.9896, <b>259.0124</b> , 241.0020, 230.0123, 212.0020, 195.0328, 166.0331  |
| G <sub>6</sub>   | benzylglucosinolate                               | 15.61 | C <sub>14</sub> H <sub>19</sub> O <sub>9</sub> NS <sub>2</sub>                | 408.0423 | 408.0402             | -4.091 | 328.0853, 274.9898, <b>259.0124</b> , 241.0022, 230.0124, 212.0021, 195.0329, 166.0332  |
| G <sub>7</sub>   | th-hydroxybenzylglucosinolate                     | 17.12 | C <sub>14</sub> H <sub>19</sub> O <sub>10</sub> NS <sub>2</sub>               | 424.0372 | 424.0350<br>446.0165 | -4.216 | 334.1130, 290.9841, 274.9896, <b>259.0125</b> , 227.9968<br>182.0279, 148.0402          |
| G <sub>8</sub> * | p-hydroxybenzylglucosinolate                      | 17.79 | C <sub>14</sub> H <sub>19</sub> O <sub>10</sub> NS <sub>2</sub>               | 424.0372 | 424.0347<br>446.0158 | -4.853 | 344.0798, 290.9841, 274.9894, <b>259.0123</b> , 227.9967,<br>182.0278, 148.0402         |
| G <sub>9</sub>   | 4-methoxyindolyl-3-methoxyglucosinolate           | 20.61 | <sub>2</sub> C <sub>17</sub> H <sub>22</sub> O <sub>10</sub> N <sub>2</sub> S | 477.0632 | 477.0611             | -3.737 | 431.1538, 408.0408, 360.7300, 274.9891, <b>259.0120</b><br>181.0544, 163.0608, 138.9703 |
| G <sub>10</sub>  | 4-methoxyindolyl-3-hexylhydroxyglucosinolate      | 20.94 | <sub>2</sub> C <sub>22</sub> H <sub>36</sub> O <sub>10</sub> N <sub>2</sub> S | 551.1727 | 551.1728             | 0.720  | 491.1543, 341.1025, <b>235.0608</b> , 178.0269, 165.0555                                |
| G <sub>11</sub>  | acetyl-benzylglucosinolate                        | 21.30 | C <sub>16</sub> H <sub>21</sub> O <sub>10</sub> NS <sub>2</sub>               | 450.0523 | 450.0505             | -3.874 | 390.0305, 370.0950, 316.9993, <b>301.0225</b> , 230.0120,<br>212.0016, 166.0327         |
| G <sub>12</sub>  | acetyl-benzylglucosinolate                        | 21.89 | C <sub>16</sub> H <sub>21</sub> O <sub>10</sub> NS <sub>2</sub>               | 450.0523 | 450.0512             | -2.386 | 390.0309, 370.0951, 316.9999, <b>301.0230</b> , 230.0122,<br>212.0020, 166.0329         |
| G <sub>13</sub>  | Pent-4-enylglucosinolate                          | 22.92 | C <sub>12</sub> H <sub>24</sub> O <sub>7</sub> N <sub>2</sub> S <sub>2</sub>  | 371.0941 | 371.0964             | 4.174  | 353.0862, 311.0759, <b>249.0612</b> , 231.0503, 175.0242, 121.0292                      |
| G <sub>14</sub>  | indolyl-3-hexyl-4-methyl-cyclohexaneglucosinolate | 24.76 | C <sub>22</sub> H <sub>38</sub> O <sub>9</sub> N <sub>2</sub> S <sub>2</sub>  | 521.1985 | 521.1992             | 1.220  | 401.1591, 371.1486, <b>359.1495</b> , 178.0633, 161.0453                                |

\* Structures confirmed by comparison with reference standards. Bold characters: the base peaks in MS<sup>n</sup> spectra

Table S7 Identification of Macaenes from Maca by UHPLC-ESI-Orbitrap MS

| NO             | name                                            | t <sub>R</sub> (min) | Formula                                        | ESI(+)/expected<br>(m/z) | ESI(+)/measured<br>(m/z) | Delta<br>(ppm) | Fragamentor information                                 |
|----------------|-------------------------------------------------|----------------------|------------------------------------------------|--------------------------|--------------------------|----------------|---------------------------------------------------------|
| M <sub>1</sub> | 5-oxo-6E,8E,10E,12E-octadecatetraenoic acid     | 32.49                | C <sub>18</sub> H <sub>26</sub> O <sub>3</sub> | 291.1954                 | 291.1952                 | -0.863         | <b>273.1852</b> , 255.1746, 237.1639, 107.0855, 97.1011 |
| M <sub>2</sub> | 5-oxo-6E,8E,10E,12E,14E-octadecapentaenoic acid | 34.68                | C <sub>18</sub> H <sub>24</sub> O <sub>3</sub> | 289.1798                 | 289.1797                 | -0.142         | <b>271.1695</b> , 253.1590, 233.1538, 215.1432, 91.0541 |

|                 |                                                                         |       |                                                |           |                      |        |                                                                              |
|-----------------|-------------------------------------------------------------------------|-------|------------------------------------------------|-----------|----------------------|--------|------------------------------------------------------------------------------|
| M <sub>3</sub>  | 5-oxo-6E,8E,10E-octadecatrienoic acid                                   | 34.77 | C <sub>18</sub> H <sub>28</sub> O <sub>3</sub> | 293.2111  | 293.2111             | 0.200  | <b>275.2007</b> , 257.1899, 201.1025, 121.0648, 91.0541                      |
| M <sub>4</sub>  | 5-oxo-6E,8E,10E,12E,14E,16E,18E,20E,22E-twenty-sixcarbonnonaenoic acid  | 38.31 | C <sub>26</sub> H <sub>32</sub> O <sub>3</sub> | 393.2424  | 393.2394             | -2.505 | <b>376.3320</b> , 239.2370, 221.2263, 123.1168                               |
| M <sub>5</sub>  | 5-oxo-6E,8E,10E,12E-eicosatetraenoic acid                               | 40.71 | C <sub>20</sub> H <sub>30</sub> O <sub>3</sub> | 319.2267  | 319.2263             | -1.320 | 301.2168, <b>273.1854</b> , 255.1748, 237.1642, 153.0913, 135.0807, 107.0856 |
| M <sub>6</sub>  | 5-oxo-6E,8E,10E,12E,14E,16E,18E,20E,22E,24E,26E -octacosundecenoic acid | 43.13 | C <sub>28</sub> H <sub>32</sub> O <sub>3</sub> | 417.24242 | 417.2393             | -2.289 | <b>389.2587</b> , 361.1774, 293.1148, 189.1638, 123.1167                     |
| M <sub>7</sub>  | 5-oxo-6E,8E-octadecadienoic acid                                        | 45.39 | C <sub>18</sub> H <sub>30</sub> O <sub>3</sub> | 295.2267  | 295.2262             | -1.630 | <b>277.2165</b> , 259.2059, 241.1953, 135.1169, 95.0854                      |
| M <sub>8</sub>  | 5-oxo-6E,8E,10E-eicosatrienoic acid                                     | 52.01 | C <sub>20</sub> H <sub>32</sub> O <sub>3</sub> | 321.2424  | 321.2417<br>343.2234 | -1.965 | 303.2323, 285.2215, <b>275.2004</b> , 257.1904, 153.0912, 135.0806           |
| M <sub>9</sub>  | 5-oxo-6E,8E-nineteencarbodienoic acid                                   | 53.02 | C <sub>19</sub> H <sub>32</sub> O <sub>3</sub> | 309.2424  | 309.2417<br>331.2235 | -2.236 | <b>277.2164</b> , 259.2058, 185.1170, 153.0911, 107.0855                     |
| M <sub>10</sub> | 5-oxo-6E,8E,10E,12E,14E,16E,18E-eicosatena batienoic acid               | 55.50 | C <sub>20</sub> H <sub>24</sub> O <sub>3</sub> | 323.2580  | 323.2572<br>345.2391 | -0.841 | 305.2480, <b>277.2168</b> , 259.2061, 153.0913, 135.0807<br>107.0856         |
| M <sub>11</sub> | 5-oxo-6E- eicosanoic acid                                               | 57.08 | C <sub>20</sub> H <sub>36</sub> O <sub>3</sub> | 325.2737  | 325.2734             | -0.773 | 308.2977, <b>277.2166</b> , 239.2009, 153.0912, 135.0806, 107.0856           |

\* Structures confirmed by comparison with reference standards. Bold characters: the base peaks in MS<sup>n</sup> spectra

Table S8 Identification of Other compounds from Maca by UHPLC-ESI-Orbitrap MS

| NO               | name                                                      | t <sub>R</sub> (min) | Formula                                                       | ESI(+)/expected<br>( <i>m/z</i> ) | ESI(+)/measured<br>( <i>m/z</i> ) | Delta<br>(ppm) | Fragamentor information                                  |
|------------------|-----------------------------------------------------------|----------------------|---------------------------------------------------------------|-----------------------------------|-----------------------------------|----------------|----------------------------------------------------------|
| O <sub>1</sub> * | 2-furoate methyl ester                                    | 2.98                 | C <sub>6</sub> H <sub>6</sub> O <sub>3</sub>                  | 127.0389                          | 127.0387                          | -1.500         | <b>95.0488</b> , 68.4856                                 |
| O <sub>2</sub> * | 1-formaldehyde-2-hydroxy-5-methoxypyridine                | 10.22                | C <sub>7</sub> H <sub>7</sub> NO <sub>3</sub>                 | 154.0497                          | 154.0498                          | 0.160          | 205.0852, <b>195.9230</b> , 149.0227                     |
| O <sub>3</sub>   | N-(3-hydroxy-5-methyl-benzyl)-2Z-2-amino-decatrienamamide | 15.08                | C <sub>11</sub> H <sub>12</sub> N <sub>2</sub> O <sub>2</sub> | 205.0971                          | 205.0968                          | -1.727         | 190.0773, <b>188.0709</b> , 170.0598, 121.0674, 91.0546  |
| O <sub>4</sub> * | 3-hydroxybenzylcyanide                                    | 19.15                | C <sub>8</sub> H <sub>7</sub> NO                              | 134.0600                          | 134.0593                          | -4.001         | <b>107.0485</b>                                          |
| O <sub>5</sub> * | catechin                                                  | 27.15                | C <sub>15</sub> H <sub>14</sub> O <sub>6</sub>                | 291.0863                          | 291.0867                          | 1.530          | 273.0766, <b>165.0550</b> , 151.0394, 139.0394, 123.0444 |

|                  |                                        |       |                                                 |          |          |        |                                                          |
|------------------|----------------------------------------|-------|-------------------------------------------------|----------|----------|--------|----------------------------------------------------------|
| O <sub>6</sub>   | Licochalcone A                         | 30.13 | C <sub>21</sub> H <sub>22</sub> O <sub>4</sub>  | 339.1592 | 339.1591 | -0.278 | <b>297.1497</b> , 283.0977, 271.0977, 245.1182, 121.0289 |
| O <sub>7</sub>   | N-ethyl-tetradecene ester              | 31.69 | C <sub>16</sub> H <sub>35</sub> NO <sub>2</sub> | 274.2740 | 274.2740 | -0.021 | <b>256.2637</b> , 212.2373, 136.1121, 93.4281            |
| O <sub>8</sub> * | 2,3-dihydroxy-acetic acid methyl ester | 33.22 | C <sub>9</sub> H <sub>9</sub> O <sub>4</sub>    | 182.0573 | 182.0623 | 2.132  | 104.0158, <b>91.0536</b> , 78.6403, 76.0209              |
| O <sub>9</sub> * | dibutyl phthalate                      | 47.22 | C <sub>16</sub> H <sub>22</sub> O <sub>4</sub>  | 279.1579 | 279.1583 | 2.247  | <b>261.2211</b> , 205.0864, 149.0235                     |
|                  |                                        |       |                                                 | 301.1396 |          |        |                                                          |

\*Structures confirmed by comparison with reference standards. Bold characters: the base peaks in MS<sup>n</sup> spectra

Table S9 Precision, stability and repeatability of 15 compounds

| Compounds       | Precision<br>(RSD%, n=3) |           | Stability<br>(RSD%, n=6) | Repeatability<br>(RSD%, n=6) |
|-----------------|--------------------------|-----------|--------------------------|------------------------------|
|                 | Intra day                | Inter day |                          |                              |
| G <sub>5</sub>  | 2.46                     | 0.43      | 2.22                     | 1.97                         |
| G <sub>3</sub>  | 1.81                     | 0.86      | 2.58                     | 1.05                         |
| G <sub>8</sub>  | 3.11                     | 1.28      | 2.33                     | 2.78                         |
| A <sub>52</sub> | 1.73                     | 0.80      | 2.63                     | 2.75                         |
| A <sub>8</sub>  | 1.56                     | 0.66      | 1.82                     | 2.33                         |
| A <sub>54</sub> | 0.98                     | 1.65      | 1.86                     | 2.06                         |
| O <sub>6</sub>  | 1.30                     | 0.99      | 1.98                     | 1.01                         |
| A <sub>66</sub> | 0.63                     | 1.83      | 1.41                     | 2.63                         |
| A <sub>67</sub> | 1.73                     | 1.19      | 2.22                     | 2.34                         |
| A <sub>5</sub>  | 0.41                     | 1.44      | 2.39                     | 2.03                         |
| A <sub>4</sub>  | 1.49                     | 0.88      | 2.57                     | 2.84                         |
| C <sub>3</sub>  | 2.36                     | 2.71      | 1.85                     | 2.71                         |

|                  |      |      |      |      |
|------------------|------|------|------|------|
| C <sub>5</sub>   | 1.41 | 1.26 | 1.02 | 1.18 |
| A <sub>121</sub> | 2.02 | 1.19 | 1.93 | 2.27 |
| O <sub>9</sub>   | 1.64 | 0.76 | 1.73 | 1.06 |

Table S10 Recoveries of 15 constituents (n=9)

| Compound        | Addition level | Initial / $\mu\text{g}$ | Added/ $\mu\text{g}$ | Measured/ $\mu\text{g}$ | Recovery rate /% | Average/% | RSD/% |
|-----------------|----------------|-------------------------|----------------------|-------------------------|------------------|-----------|-------|
| G <sub>5</sub>  | 1:0.8          | 36957.84                | 29566.26             | 65509.98                | 96.57            | 97.60     | 0.94  |
|                 | 1:1            | 36957.84                | 36957.85             | 73302.19                | 98.34            |           |       |
|                 | 1:1.2          | 36957.84                | 44349.40             | 80367.03                | 97.88            |           |       |
| G <sub>3</sub>  | 1:0.8          | 1421.32                 | 1137.05              | 2537.79                 | 98.19            | 97.96     | 1.22  |
|                 | 1:1            | 1421.32                 | 1421.30              | 2828.83                 | 99.03            |           |       |
|                 | 1:1.2          | 1421.32                 | 1705.59              | 3070.11                 | 96.67            |           |       |
| G <sub>8</sub>  | 1:0.8          | 369.62                  | 295.71               | 665.48                  | 100.05           | 98.89     | 1.01  |
|                 | 1:1            | 369.62                  | 369.58               | 733.14                  | 98.36            |           |       |
|                 | 1:1.2          | 369.62                  | 443.55               | 805.50                  | 98.27            |           |       |
| A <sub>52</sub> | 1:0.8          | 930.86                  | 744.70               | 1652.33                 | 96.88            | 96.95     | 1.44  |
|                 | 1:1            | 930.86                  | 930.83               | 1820.64                 | 95.59            |           |       |
|                 | 1:1.2          | 930.86                  | 1117.05              | 2029.70                 | 98.37            |           |       |
| A <sub>8</sub>  | 1:0.8          | 12.73                   | 10.20                | 22.95                   | 100.20           | 98.73     | 2.08  |
|                 | 1:1            | 12.73                   | 12.70                | 24.97                   | 96.38            |           |       |
|                 | 1:1.2          | 12.73                   | 15.28                | 27.95                   | 99.61            |           |       |
| A <sub>54</sub> | 1:0.8          | 431.74                  | 345.40               | 767.64                  | 97.25            | 98.68     | 1.38  |
|                 | 1:1            | 431.74                  | 431.69               | 863.26                  | 99.96            |           |       |

---

|                  |       |        |        |        |        |       |      |
|------------------|-------|--------|--------|--------|--------|-------|------|
|                  | 1:1.2 | 431.74 | 518.10 | 943.78 | 98.83  |       |      |
|                  | 1:0.8 | 0.39   | 0.32   | 0.70   | 96.88  |       |      |
| O <sub>6</sub>   | 1:1   | 0.39   | 0.31   | 0.69   | 96.77  | 96.49 | 0.60 |
|                  | 1:1.2 | 0.39   | 0.48   | 0.85   | 95.83  |       |      |
|                  | 1:0.8 | 8.56   | 6.85   | 15.16  | 96.35  |       |      |
| A <sub>66</sub>  | 1:1   | 8.56   | 8.53   | 16.86  | 97.30  | 96.39 | 0.92 |
|                  | 1:1.2 | 8.56   | 10.28  | 18.38  | 95.53  |       |      |
|                  | 1:0.8 | 2.45   | 1.98   | 4.40   | 98.48  |       |      |
| A <sub>67</sub>  | 1:1   | 2.45   | 2.44   | 4.87   | 99.18  | 97.98 | 1.55 |
|                  | 1:1.2 | 2.45   | 2.95   | 5.29   | 96.27  |       |      |
|                  | 1:0.8 | 19.93  | 15.95  | 35.91  | 100.19 |       |      |
| A <sub>5</sub>   | 1:1   | 19.93  | 19.89  | 39.03  | 96.03  | 98.36 | 2.16 |
|                  | 1:1.2 | 19.93  | 23.95  | 43.61  | 98.87  |       |      |
|                  | 1:0.8 | 4.61   | 3.69   | 8.11   | 94.85  |       |      |
| A <sub>4</sub>   | 1:1   | 4.61   | 4.59   | 9.03   | 96.30  | 96.27 | 1.46 |
|                  | 1:1.2 | 4.61   | 5.55   | 10.03  | 97.66  |       |      |
|                  | 1:0.8 | 10.17  | 8.15   | 18.02  | 96.32  |       |      |
| C <sub>3</sub>   | 1:1   | 10.17  | 10.15  | 20.15  | 98.33  | 97.15 | 1.08 |
|                  | 1:1.2 | 10.17  | 12.20  | 21.98  | 96.80  |       |      |
|                  | 1:0.8 | 73.04  | 58.45  | 130.45 | 98.22  |       |      |
| C <sub>5</sub>   | 1:1   | 73.04  | 73.08  | 145.43 | 99.06  | 98.07 | 1.10 |
|                  | 1:1.2 | 73.04  | 87.65  | 157.99 | 96.92  |       |      |
| A <sub>121</sub> | 1:0.8 | 0.21   | 0.17   | 0.37   | 94.12  | 96.71 | 3.11 |

---



|                |       |      |      |      |        |       |      |
|----------------|-------|------|------|------|--------|-------|------|
|                | 1:1   | 0.21 | 0.21 | 0.42 | 100.00 |       |      |
|                | 1:1.2 | 0.21 | 0.25 | 0.45 | 96.00  |       |      |
|                | 1:0.8 | 2.89 | 2.31 | 5.18 | 99.13  |       |      |
| O <sub>9</sub> | 1:1   | 2.89 | 2.90 | 5.72 | 97.59  | 97.66 | 1.47 |
|                | 1:1.2 | 2.89 | 3.48 | 6.24 | 96.26  |       |      |

Table S11 Samples of Maca from different places

| NO.                 | Places      | Weight (g) |
|---------------------|-------------|------------|
| 1                   | Xingjiang-1 | 1.15       |
| 2                   | Xinjiang-2  | 1.07       |
| 3                   | Xizang-1    | 1.03       |
| 4                   | Xizang-2    | 1.03       |
| 5                   | Peru-1      | 1.16       |
| 6                   | Peru-2      | 1.02       |
| 7                   | Yunnan-1    | 1.03       |
| 8                   | Yunnan-2    | 1.08       |
| 9                   | Yunnan-3    | 1.02       |
| 10                  | Yunnan-4    | 1.04       |
| 11                  | Yunnan-5    | 1.06       |
| 12                  | Yunnan-6    | 1.06       |
| 13                  | Yunnan-7    | 1.05       |
| 14                  | Yunnan-8    | 1.07       |
| 15                  | Yunnan-9    | 1.12       |
| 16                  | Yunnan-10   | 1.07       |
| 17                  | Yunnan-11   | 1.04       |
| Leaves of Maca (12) | Yunnan-6    | 1.04       |
